# Supplementary material for: Vibrational Spectroscopy in Urine Samples as a Medical Tool: Review and Overview on the Current State-of-the-Art
Source: MDPI journal article supplement (doi:10.3390/diagnostics13010027), 2022-12-22
Supplement: s1 [file s1]

**Table S2: Supplementary Materials; Review Papers. F.Vigo et al., 2022, Diagnostics.**

| <b>Autor</b>            | <b>Year</b> | <b>Title</b>                                                                                                                                                                        | <b>Technique</b>         |
|-------------------------|-------------|-------------------------------------------------------------------------------------------------------------------------------------------------------------------------------------|--------------------------|
| 1 <i>B. Formoso</i>     | 2020        | Cancer Diagnosis through SERS and Other Related Techniques                                                                                                                          | SERS                     |
| 2 <i>K. Naseer</i>      | 2020        | ATR-FTIR spectroscopy as the future of diagnostics: a systematic review of the approach using bio-fluids                                                                            | ATR-FTRI                 |
| 3 <i>Y. Borong</i>      | 2019        | Development of surface-enhanced Raman spectroscopy application for determination of illicit drugs: Towards a practical sensor                                                       | SERS                     |
| 4 <i>S. Pahlow</i>      | 2018        | Application of Vibrational Spectroscopy and Imaging to Point-of-Care Medicine: A Review                                                                                             | Vibrational Spectroscopy |
| 5 <i>L.B. Leala</i>     | 2018        | Vibration spectroscopy and body biofluids: Literature review for clinical applications                                                                                              | Vibrational Spectroscopy |
| 6 <i>S. Pahlow</i>      | 2018        | Application of Vibrational Spectroscopy and Imaging to Point-of-Care Medicine: A Review                                                                                             | Vibrational Spectroscopy |
| 7 <i>Z. Xiao-Shan</i>   | 2018        | Label-free SERS in biological and biomedical applications: Recent progress, current challenges and opportunities                                                                    | SERS                     |
| 8 <i>J. Smolsky</i>     | 2017        | Surface-Enhanced Raman Scattering-Based Immunoassay Technologies for Detection of Disease Biomarkers                                                                                | SERS                     |
| 9 <i>W. Christian</i>   | 2016        | Critical Review Upon the Role and Potential of Fluorescence and Near-Infrared Imaging and Absorption Spectroscopy in Cancer Related Cells, Serum, Saliva, Urine and Tissue Analysis | IR                       |
| 10 <i>M.L. Baker</i>    | 2016        | Developing and understanding biofluid vibrational spectroscopy: a critical review                                                                                                   | Vibrational Spectroscopy |
| 11 <i>A. Bonifacio</i>  | 2015        | Label-free surface-enhanced Raman spectroscopy of biofluids: fundamental aspects and diagnostic applications                                                                        | SERS                     |
| 12 <i>U. Neugebauer</i> | 2015        | Raman spectroscopy towards clinical application: drug monitoring and pathogen identification                                                                                        | RS                       |
| 13 <i>A.L. Mitchell</i> | 2014        | Vibrational spectroscopy of biofluids for disease screening or diagnosis: translation from the laboratory to a clinical setting                                                     | Vibrational Spectroscopy |
| 14 <i>E. Mauriz</i>     | 2020        | Low-Fouling Substrates for Plasmonic Sensing of Circulating Biomarkers in Biological Fluids (SERS)                                                                                  | SERS                     |
| 15 <i>G. Hoşafçı</i>    | 2007        | Clinical chemistry without reagents? An infrared spectroscopic technique for determination of clinically relevant constituents of body fluids                                       | IR                       |
| 16 <i>R. Meier</i>      | 2005        | Vibrational spectroscopy: a ‘vanishing’ discipline?                                                                                                                                 | Vibrational Spectroscopy |
| 17 <i>M. Janelle</i>    | 2005        | Photodiagnosis using Raman and surfaceenhanced Raman scattering of bodily fluids                                                                                                    | SERS                     |

ATR-FTRI: Attenuated Total Reflection Fourier Transform Infrared Spectroscopy; SERS: Surface-Enhanced Raman Spectroscopy; IR: Infrared Spectroscopy
