# Supplementary material for: Vibrational Spectroscopy in Urine Samples as a Medical Tool: Review and Overview on the Current State-of-the-Art
Source: MDPI journal article supplement (doi:10.3390/diagnostics13010027), 2022-12-22
Supplement: s1 [file s1]

Table S1: Supplementary Materials. Papers’ Timeline; F.Vigo et al., 2022

|    | I. Autor        | Year | Title                                                                                                                                                                          | Type | Technik  | Statistical Algorithms                        | Statistical Software | Enhancing Surface                                            | N   | Samples/ research field                                                                                                           | Aliquot | LOD                       | Filter/ pore size        | Storage T°  | WN Range cm <sup>-1</sup> | Centrifugation                                     | Laser              | Spectral Resolution | Cleaning Procedure | Total Procedure Time | Others                                                                                                                                       |
|----|-----------------|------|--------------------------------------------------------------------------------------------------------------------------------------------------------------------------------|------|----------|-----------------------------------------------|----------------------|--------------------------------------------------------------|-----|-----------------------------------------------------------------------------------------------------------------------------------|---------|---------------------------|--------------------------|-------------|---------------------------|----------------------------------------------------|--------------------|---------------------|--------------------|----------------------|----------------------------------------------------------------------------------------------------------------------------------------------|
| 1  | W. Zhu          | 2020 | Rapid and low-cost quantitative detection of creatinine in human urine with a portable Raman spectrometer                                                                      |      | SERS     | n.s.                                          | n.s.                 | Au solution                                                  | 5   | Creatinine                                                                                                                        | n.s.    | 1.45 mg L                 | no                       | n.s.        | 500 – 1600                | no                                                 | 785 nm 500 mW 1s   | n.s.                | -                  | < 2 min              | - Cost ¥0.2 each sample<br>- Spiked Urine                                                                                                    |
| 2  | Y. Ma           | 2020 | Therapeutic prognosis of prostate cancer using surface-enhanced Raman scattering of patient urine and multivariate statistical analysis                                        |      | SERS     | GA-PLS-LDA                                    | n.s.                 | AgNPs                                                        | 75  | Treatment response of prostate cancer                                                                                             | 2 µL    | -                         | no                       | -80 °C      | 300 – 1700                | 10000 rpm for 10min                                | 632.8 nm 5 mW 20s  | n.s.                | -                  | n.s.                 | Catheter prior to surgery                                                                                                                    |
| 3  | X. Cui          | 2020 | Label-free detection of multiple genitourinary cancers from urine by surface-enhanced Raman spectroscopy                                                                       |      | SERS     | PCA-LDA                                       | n.s.                 | silver colloidal solution                                    | 158 | Detecting different cancers and healthy controls                                                                                  | n.s.    | -                         | Ultrafiltration membrane | -80°C       | 500 – 1800                | 14000 rpm for 10min                                | 785 nm 5 s         | 1cm <sup>-1</sup>   | -                  | n.s.                 | Fasting urine                                                                                                                                |
| 4  | Y. Si           | 2020 | A novel surface-enhanced Raman scattering-based ratiometric approach for detection of hyaluronidase in urine                                                                   |      | SERS     | n.s.                                          | n.s.                 | AuNRs                                                        | -   | Hyaluronidase activity                                                                                                            | 40 µL   | 1.7 U mL <sup>-1</sup>    | -                        | -           | 1800 – 2200               | -                                                  | 633 nm 2mW 6s      | n.s.                | -                  | n.s.                 | Spiked Urine                                                                                                                                 |
| 5  | A. Gaipov       | 2020 | Development and validation of hybrid Brillouin-Raman spectroscopy for non-contact assessment of mechano-chemical properties of urine proteins as biomarkers of kidney diseases |      | SERS     | n.s.                                          | STATA MP Version 15  | AgNPs                                                        | 100 | Assessment of visco-elastic and chemical properties of proteins                                                                   | n.s.    | -                         | no                       | -80 °C      | n.s.                      | no                                                 | 785 nm             | n.s                 | -                  | -                    | -                                                                                                                                            |
| 6  | M. Steenbeke    | 2020 | Exploring the possibilities of infrared spectroscopy for urine sediment examination and detection of pathogenic bacteria in urinary tractinfections                            |      | ATR-FTIR | - PCA<br>- SIMCA                              | n.s.                 | -                                                            | 147 | - Bacteria Gram+ and<br>- Lipids<br>- Proteins<br>- Nucleic acids<br>- Carbohydrates<br>- White and red blood cells<br>- Crystals | n.s.    | -                         | no                       | n.s.        | 400 – 4000                | 10 min RT 1439 × g followed by 10 min, RT, 669 × g | -                  | 4 cm <sup>-1</sup>  | n.s.               | n.s.                 | Dried urine specimens                                                                                                                        |
| 7  | D. Perez-Guaíta | 2020 | Quantification and Identification of Microproteinuria Using Ultrafiltration and ATR-FTIR Spectroscopy                                                                          |      | ATR-FTIR | - SNV<br>- PCA<br>- RMSEP<br>- MCR-ALS        | n.s.                 | -                                                            | 6   | - Haemoglobin<br>- Albumin<br>- Immunoglobulin                                                                                    | 0.8 µL  | Alb. 6.7 ppm<br>Hb 50 ppm | 0.22 µm                  | n.s.        | 800 – 4000                | 14000g for 15 min x3 times                         | -                  | 4 cm <sup>-1</sup>  | n.s.               | n.s.                 | - Dried Urine<br>- Spiked Urine                                                                                                              |
| 8  | Y. Hong         | 2020 | Optoplasmonic Hybrid Materials for Trace Detection of Methamphetamine in Biological Fluids through SERS                                                                        |      | SERS     | n.s.                                          | n.s.                 | SiO2–AuNPs                                                   | -   | Methamphetamine                                                                                                                   | 100 µL  | 1x10 <sup>-8</sup> M      | -                        | n.s.        | 600 – 1700                | no                                                 | 785 nm 10s         | n.s.                | -                  | n.s.                 | -                                                                                                                                            |
| 9  | D. Lu           | 2020 | Silver nanocube coupling with a nanoporous silver film for dual-molecule recognition base dultrasensitive SERS detection of dopamine                                           |      | SERS     | n.s                                           | n.s.                 | AgNF AgNCs                                                   | -   | Dopamine                                                                                                                          | <100µL  | 40 fM                     | no                       | n.s.        | 500 – 1800                | 10000rpm for 10 min                                | 785 nm             | n.s.                | -                  | n.s.                 | Spiked Urine                                                                                                                                 |
| 10 | J.E.L. Villa    | 2020 | Colloidal gold clusters formation and chemometrics for direct SERS determination of bioanalyses in complex media                                                               |      | SERS     | - MCR-ALS<br>- PLSR                           | MATLAB               | GNPs                                                         | -   | - Adenine<br>- Guanine                                                                                                            | n.s.    | 2 µM                      | n.s.                     | n.s.        | 400 – 1800                | -                                                  | 785nm 250mW 40 s   | 2 cm <sup>-1</sup>  | -                  | n.s.                 | Spike Urine                                                                                                                                  |
| 11 | N.E. Markina    | 2020 | Liquid-liquid extraction-assisted SERS-based determination of sulfamethoxazole in spiked human urine                                                                           |      | LLE-SERS | n.s.                                          | OriginPro v.8.5      | AgNPs                                                        | 13  | Sulfamethoxazole                                                                                                                  | 62 µL   | 1.7 mgmL <sup>-1</sup>    | .                        | fresh / -80 | 400-1800 cm <sup>-1</sup> | 2000 g for 3 min                                   | 488 nm 24 mW 10s   | n.s.                | -                  | ~30 min              | Spiked Urine                                                                                                                                 |
| 12 | Y.C. Kao        | 2020 | Multiplex Surface-Enhanced Raman Scattering Identification and Quantification of Urine Metabolites in Patient Samples within 30 min                                            |      | SERS     | - PCA<br>- PLSR                               | n.s.                 | Ag nanocubes<br>Ag octahedra                                 | 40  | Miscarriage risk metabolites:<br>- 5β-pregnane-3α, 20α-diol-3α-glucuronide<br>- tetrahydrocortisone                               | 10 µL   | n.s                       | no                       | n.s.        | 500 - 1700                | no                                                 | 532 nm 0.2 mW 1 s. | n.s.                | -                  | ~30 min              | -                                                                                                                                            |
| 13 | P. Zhang        | 2019 | A Molecular Beacon Based Surface-Enhanced Raman Scattering Nanotag for Noninvasive Diagnosis of Bladder Cancer                                                                 |      | SERS     | n.s.                                          | n.s.                 | Sea urchin-like gold nanoparticles                           | 13  | - mRNA<br>- Early bladder cancer diagnosis                                                                                        | n.s.    | 19.4 nM                   | n.s.                     | n.s.        | n.s.                      | n.s.                                               | n.s.               | n.s.                | -                  | n.s.                 | -                                                                                                                                            |
| 14 | A. Takamura     | 2019 | Phenotype Profiling for Forensic Purposes: Determining Donor Sex Based on Fourier Transform Infrared Spectroscopy of Urine Traces                                              |      | ATR-FTIR | - PLS-DA<br>- GA                              | n.s.                 | -                                                            | 101 | Donor Sex gender                                                                                                                  | 30 µL   | -                         | no                       | -80 °C      | 600 – 3700                | no                                                 | -                  | 4 cm <sup>-1</sup>  | 70% Ethanol        | n.s.                 | Dried urine                                                                                                                                  |
| 15 | Y. Gao          | 2019 | CTAB-triggered Ag aggregates for reproducible SERS analysis of urinary polycyclic aromatic hydrocarbon metabolites                                                             |      | SERS     | - Linear double logarithmic equation<br>- RSD | n.s.                 | AgNPs                                                        | 1   | Polycyclic aromatic hydrocarbon metabolites                                                                                       | n.s.    | 0.1 µL                    | n.s.                     | n.s.        | 300 – 2000                | n.s.                                               | n.s.               | n.s.                | -                  | n.s.                 | Spiked Urine                                                                                                                                 |
| 16 | K. Wang         | 2019 | Elucidating fentanyl's differentiation from morphines in chemical and biological samples with surface-enhanced Raman spectroscopy                                              |      | SERS     | - PCA<br>- PLSDA                              | n.s.                 | AuNPs                                                        | 3   | - Fentanyl<br>- Morphine                                                                                                          | 200 µL  | 50 ng/mL                  | n.s                      | n.s         | 400 – 1800                | 5206rpm for 1min + 6000 rpm for 10 min             | 785nm 90 mW 10s    | n.s.                | -                  | n.s.                 | Spiked Urine                                                                                                                                 |
| 17 | B. Murugesan    | 2019 | Tunable Coffee Ring Formation on Polycarbonate Nanofiber Film for Sensitive SERS Detection of Phenylalanine in Urine                                                           |      | SERS     | Linear relationship                           | n.s.                 | Polyvinylpyrrolidone (PVP)-stabilized silver colloidal (AgC) | 3   | Phenylalanine                                                                                                                     | 10 µL   | 50 µM                     | no                       | fresh       | 500 – 1700                | Yes                                                | 632.8 nm 25 mW 1 s | 0.06 nm             | -                  | n.s.*                | - Spiked Urine<br>- Estimated detection limit: 2.35 µM<br>- Dried Urine<br>* at least more than 10 min ( time necessary to let the drop dry) |

|    |                  |      |                                                                                                                                                                                            |  |          |                                                                                                  |                                        |                                |      |                                                                                  |        |                           |      |                             |             |                        |                            |                    |      |        |                                                                                                                     |
|----|------------------|------|--------------------------------------------------------------------------------------------------------------------------------------------------------------------------------------------|--|----------|--------------------------------------------------------------------------------------------------|----------------------------------------|--------------------------------|------|----------------------------------------------------------------------------------|--------|---------------------------|------|-----------------------------|-------------|------------------------|----------------------------|--------------------|------|--------|---------------------------------------------------------------------------------------------------------------------|
| 18 | H. Yang          | 2019 | Influence of drugs on the prospective diagnostic method for coronary heart disease with urine                                                                                              |  | SERS     | PCA-LDA                                                                                          | n.s.                                   | -                              | 26   | Coronary heart disease (PDGF-BB)                                                 | n.s.   | -                         | no   | 4 °C                        | 1200 – 1600 | no                     | 785 nm<br>10s              | n.s.               | -    | n.s.   | -                                                                                                                   |
| 19 | S. Lee           | 2019 | Diagnosis in a Preclinical Model of Bladder Pain Syndrome Using a Au/ZnO Nanorod-based SERS Substrate                                                                                      |  | SERS     | PCA                                                                                              | XLSTAT 2018                            | Au/ZnO NRs                     | -    | Bladder pain                                                                     | 5 µL   | -                         | no   | n.s.                        | 550 – 1500  | no                     | 785nm<br>1mW<br>40s        | 1 cm <sup>-1</sup> | -    | n.s    | -                                                                                                                   |
| 20 | M.T. Alula       | 2019 | Preparation of silver nanoparticles coated ZnO/Fe3O4 composites using chemical reduction method for sensitive detection of uric acid via surface-enhanced Raman spectroscopy               |  | SERS     | n.s.                                                                                             | n.s.                                   | AgNPs/ZnO/Fe3O4                | -    | Uric acid                                                                        | 10 uL  | 15 µM                     | no   | fresh                       | 400 – 1800  | no                     | 532nm<br>7.25mW<br>20s     | n.s                | -    | n.s.*  | *> 20min                                                                                                            |
| 21 | M. Jue           | 2019 | Optimization of ZnO Nanorod-Based Surface Enhanced Raman Scattering Substratesfor Bio-Applications                                                                                         |  | SERS     | - Neural Density<br>- Savitzky–Golay smoothing method                                            | - RAON-Spec<br>- Origin                | ZnO                            | -    | Rhodamine B                                                                      | n.s    | -                         | no   | n.s                         | 400 – 1600  | no                     | 785-nm<br>1 – 0.1mW<br>50s | 1 cm <sup>-1</sup> | -    | n.s    | -                                                                                                                   |
| 22 | Z. Huang         | 2019 | Sensitive polydopamine bi-functionalized SERS immunoassay for microalbuminuria detection                                                                                                   |  | SERS     | n.s.                                                                                             | - Origin 8<br>- Graph Prism 6.0        | polydopamine bi-functionalized | 22   | Microalbuminuria                                                                 | 2 µL   | 0.2 mg/L.                 | no   | -20 °C                      | 950 – 1200  | no                     | 785 nm<br>4mW<br>1s        | n.s.               | -    | 5min   | -                                                                                                                   |
| 23 | K. Sivashanmugan | 2019 | Tetrahydrocannabinol Sensing in Complex Biofluid with Portable Raman Spectrometer Using Diatomaceous SERS Substrates                                                                       |  | TLC-SERS | PCA                                                                                              | n.s.                                   | AuNPs                          | n.s. | Tetrahydrocannabinol                                                             | 2 µL   | 10ppm                     | yes  | -                           | 400 – 1800  | no                     | 785 nm<br>420 mW<br>10s    | n.s.               | -    | -      | - Spiked urine<br>- All samples were analysed within 3 h of collection<br>- Air-dried samples                       |
| 24 | H. Muhamadali    | 2019 | Rapid Detection and Quantification of Novel Psychoactive Substances (NPS) Using Raman Spectroscopy and Surface-Enhanced Raman Scattering                                                   |  | SERS     | - PCA<br>- PLSR                                                                                  | MATLAB                                 | Ag colloid                     | -    | - Methcathinones<br>- Aminoindanes<br>- Diphenidines<br>- Synthetic cannabinoids | 100 µL | 2mM                       | no   | 4°C than within 2h<br>–80°C | 100 – 1800  | 5000g for 10min at 4°C | 785 nm<br>60mW<br>20s      | n.s.               | -    | -      | - Mid-stream first morning urine samples<br>- Spiked Urine                                                          |
| 25 | N. Markina       | 2019 | Application of Aluminium Hydroxide for Improvement of Label-Free SERS Detection of Some Cephalosporin Antibiotics in Urine                                                                 |  | SERS     | RSD                                                                                              | n.s.                                   | AgNPs                          | 5    | Cephalosporin                                                                    | n.s.   | 20-90 µg/mL               | no   | 4 °C                        | 400 – 1800  | 1700g for 2 min        | 638nm<br>1s                | n.s                | -    | 15min  | - Samples were stored at 4 °C and used for analysis within one day after collecting<br>- Spiked urine               |
| 26 | S. Han           | 2019 | Rapid and Sensitive Surface-enhanced Raman Spectroscopy Method for Determination of Ketamine in Urine                                                                                      |  | SERS     | - Correlation coefficient<br>- Linear relationship                                               | n.s.                                   | - AgNPs<br>- NaBr              | 14   | Ketamine                                                                         | n.s.   | 7.5 ppm                   | -    | -                           | 175 – 2000  | -                      | 785 nm<br>80mW<br>5s       | 3 cm <sup>-1</sup> | -    | n.s.   | -                                                                                                                   |
| 27 | F. Enduo         | 2019 | Dual-Mode Au Nanoprobe Based on Surface Enhancement Raman Scattering and Colorimetry for Sensitive Determination of Telomerase Activity Both in Cell Extracts and in the Urine of Patients |  | SERS     | - Linear relationship<br>- Linear regression equation<br>- Michaelis–Menten equation             | n.s.                                   | AuNPs                          | 24   | Telomerase Activity                                                              | n.s    | 6.1 ×10 <sup>-15</sup> IU | n.s  | n.s                         | n.s         | n.s                    | 633 nm<br>10 mW            | n.s                | -    | n.s.   | -                                                                                                                   |
| 28 | S. Feng          | 2019 | Assessment of treatment efficacy using surface-enhanced Raman spectroscopy analysis of urine in rats with kidney transplantation or kidney disease                                         |  | SERS     | - PCA<br>- LDA<br>- PLS                                                                          | n.s.                                   | Ag colloids                    | 41   | Assessment of treatment efficacy in kidney treatment                             | 5 µL   | -                         | no   | – 80 °C                     | 500 – 1800  | 3000rpm for 10min      | 785 nm<br>150 mW<br>1s     | 8 cm <sup>-1</sup> | -    | n.s.   | -                                                                                                                   |
| 29 | I. Suzuki        | 2019 | NIR spectroscopic determination of urine components in spot urine: preliminary investigation towards optical point-of-care test                                                            |  | NIR-FT   | - Multi-linear regression<br>- Partial least squares regression                                  | n.s.                                   | -                              | 110  | Na / Creatinine Ratio                                                            | n.s.   | -                         | no   | n.s.                        | 4300 – 7150 | no                     | -                          | n.s.               | n.s. | n.s.   | -                                                                                                                   |
| 30 | M. Muhammad      | 2019 | Label-free SERS diagnostics of radiation-induced injury via detecting the biomarker Raman signal in the serum and urine bio-samples based on Au-NPs array substrates                       |  | SERS     | - Linear-Savitzky-Golaywithin.<br>- One-way ANOVA with Tukey's tests                             | NG-Lab Spec                            | Au-NPs                         | 5    | Radiation-induced injury                                                         | n.s.   | -                         | n.s. | n.s.                        | 500 – 1750  | no                     | 785 nm                     | n.s.               | -    | n.s.   | -                                                                                                                   |
| 31 | B. Ankudze       | 2018 | Ultrasensitive and recyclable superstructure of Au SiO2@Ag wire for surface enhanced Raman scattering detection of thiocyanate in urine and human serum                                    |  | SERS     | n.s.                                                                                             | n.s.                                   | Au-SiO2@Ag                     | -    | Thiocyanate                                                                      | n.s.   | 0.01 µM                   | -    | -                           | 1800 – 2800 | -                      | 785 nm<br>3mW<br>10s       | -                  | -    | n.s.   | Spiked Urine                                                                                                        |
| 32 | A. Pallaoro      | 2018 | Screening for canine transitional cell carcinoma (TCC) by SERS-based quantitative urine cytology                                                                                           |  | SERS     | - CLS<br>- Mann–Whitney nonparametric test<br>- receiver operating characteristic curve plotting | - Matlab<br>- PLS-Toolbox<br>OriginPro | AgNP                           | 10   | Cancerous transitional cells                                                     | 7.5 µL |                           | no   | –80 °C                      | 250 – 1750  | 1000g for 3-4 min      | 633 nm<br>50-90 µW<br>0.5s | n.s                | -    | -      | - Frozen, urine samples were thawed in a 37 °C water bath<br>- After centrifugation urine supernatant was discarded |
| 33 | K.M. Koo         | 2018 | Design and Clinical Verification of Surface-Enhanced Raman Spectroscopy Diagnostic Technology for Individual Cancer Risk Prediction                                                        |  | SERS     | - Vancouver Raman Algorithm<br>- PCA                                                             | SPSS 19.0                              | AgNPs                          | 120  | Prostate cancer risk                                                             | 61 µL  |                           | n.s. | n.s.                        | 400 – 1800  | n.s.                   | 785 nm<br>70 mW<br>1s      | n.s.               | -    | 90 min | -                                                                                                                   |

|    |                  |      |                                                                                                                                                                                                 |  |          |                                                                            |                                  |                                     |      |                                                                                     |        |                        |      |                             |                             |                     |                            |                      |                 |          |                                                                                                            |
|----|------------------|------|-------------------------------------------------------------------------------------------------------------------------------------------------------------------------------------------------|--|----------|----------------------------------------------------------------------------|----------------------------------|-------------------------------------|------|-------------------------------------------------------------------------------------|--------|------------------------|------|-----------------------------|-----------------------------|---------------------|----------------------------|----------------------|-----------------|----------|------------------------------------------------------------------------------------------------------------|
| 34 | Yuan Xiang       | 2018 | Surface enhanced Raman detection of the colon cancer biomarker cytidine by using magnetized nanoparticles of the type Fe3O4/Au/Ag                                                               |  | SERS     | Linear relationship                                                        | n.s.                             | Fe3O4/Au/Ag                         | n.s. | Cytidine                                                                            | 100 µL | 1 nM                   | n.s. | -                           | 400 – 2000                  | n.s.                | 633 nm<br>5 mW<br>8 s      | n.s.                 | -               | n.s.     | Spiked Urine                                                                                               |
| 35 | X. Lin           | 2018 | A novel urine analysis technique combining affinity chromatography with Au nanoparticle based surface enhanced Raman spectroscopy for potential applications in non-invasive cancer screening   |  | SERS     | - PCA-LDA<br>- ROC curve                                                   | WIRE 3.4                         | AuNPs                               | 151  | Detection of modified nucleoside in human urine                                     | 2 µL   | -                      | no   | –80 °C                      | 600 – 1700                  | 12000rpm for 10 min | 785 nm<br>2.3 mW<br>10s    | 2 cm <sup>-1</sup>   | -               | n.s.     | 12 hours of overnight fasting before collection                                                            |
| 36 | M. Paraskevasidi | 2018 | Potential of mid-infrared spectroscopy as a non invasive diagnostic test in urine for endometrial or ovarian cancer                                                                             |  | ATR-FTIR | - PLS-DA<br>- PCA-SVM<br>- GA-LDA                                          | PLS Toolbox 7.9.3                | -                                   | 30   | - Endometrial cancer<br>- Ovarian cancer                                            | 50 µl  | -                      | no   | –80 °C                      | 800 – 1800                  | no                  | -                          | 8 cm <sup>-1</sup>   | Distilled water | n.s.     | -6 hours fasting prior surgery<br>-Samples are left to air-dry for approximately 45 min                    |
| 37 | I. Suzuki        | 2018 | Reagentless Estimation of Urea and Creatinine Concentrations Using Near-Infrared Spectroscopy for Spot Urine Test of Urea-to-Creatinine Ratio                                                   |  | NIR-FT   | - leave-one-out cross-validation<br>- SEP<br>- Correlation coefficient (γ) | R programming version 3.3.1      | -                                   | 110  | - Urea<br>- Creatinine                                                              | n.s.   | -                      | no   | n.s.                        | 4300 – 7150                 | no                  | -                          | 1.667 nm             | -               | 30 s     | - Measures at room temperature of 25°C<br>- Spiked Urine                                                   |
| 38 | L.P. Moreira     | 2018 | Detecting urine metabolites related to training performance in swimming athletes by means of Raman spectroscopy and principal component analysis                                                |  | RS       | - PCA<br>- ANOVA                                                           | - Matlab 7.4<br>- RamanSoft 1.04 | -                                   | 23   | - Urea<br>- Creatinine<br>- Ketone bodies<br>- Nitrogenous compounds<br>- Phosphate | 80 µL  | -                      | no   | -20°C                       | 400 – 1800                  | no                  | 830nm<br>350mW<br>20s      | 4 cm <sup>-1</sup>   | -               | n.s.     | Frozen urine samples were passively warmed up to room temperature (25°C)                                   |
| 39 | Q. Zhu           | 2018 | Antipsychotic drug poisoning monitoring of clozapine in urine by using coffee ring effect-based surface-enhanced Raman spectroscopy                                                             |  | CRE-SERS | - Savitzky-Golay polynomial fitting<br>- Density functional theory         | - Matlab<br>- Origin 7.5         | Ag colloids                         | n.s  | Clozapine                                                                           | 1 µL   | 0.5µg mL <sup>-1</sup> | no   | -20°C                       | 350 – 2300                  | 10000rpm for 10min  | 785 nm<br>200mW<br>5s      | 5 cm <sup>-1</sup>   | -               | -        | -                                                                                                          |
| 40 | M.E. Markina     | 2018 | Sample pretreatment and SERS-based detection of ceftriaxone in urine                                                                                                                            |  | SERS     | Calibration plots                                                          | n.s.                             | AgNPs                               | -    | Ceftriaxone                                                                         | 10 µL  | 0.4 µg/mL              | -    | -                           | 300 – 2000                  | no                  | 473 nm<br>5mW<br>10 s      | 3 cm <sup>-1</sup>   | -               | ~ 10 min | Spiked Urine                                                                                               |
| 41 | Z. Mukanova      | 2018 | Detection of Paracetamol in Water and Urea in Artificial Urin e with Gold Nanoparticle@Al Foil Cost-efficient SERS Substrate                                                                    |  | SERS     | Calibration curve                                                          | n.s.                             | AuNPs                               |      | Urea                                                                                | 25 µL  | 0.026 M                | -    | -                           | 800 – 1400                  | -                   | 633 nm<br>1.5 - 3 mW<br>5s | n.s.                 | -               | -        | Spiked Urine                                                                                               |
| 42 | H. Yang          | 2018 | Non invasive and prospective diagnosis of coronary heart disease with urine using surface-enhanced Raman spectroscopy                                                                           |  | SERS     | - PCA-LDA<br>- Leave-one-out cross validation<br>- Savisky-Golay smoothing | n.s.                             | -                                   | 107  | - Diagnosis of coronary heart disease<br>- PDGF-BB                                  | 0.5 ml | 0.01 ppm               | no   | 4 °C                        | 1140 – 1620                 | no                  | 785 nm<br>10s              | 0.7 cm <sup>-1</sup> | -               | -        | -The urine samples were obtained before performing PCI<br>-Urine was collected in the morning at 8 o'clock |
| 43 | S. Weng          | 2018 | Dynamic surface-enhanced Raman spectroscopy and Chemometric methods for fast detection and intelligent identification of methamphetamine and 3, 4-Methylenedioxy methamphetamine in human urine |  | D-SERS   | - PCA<br>- Random forest                                                   | n.s.                             | mPEG-SH coated gold nanorods (GNRs) | 550  | - Methamphetamine<br>- 3, 4-Methylenedioxy methamphetamine                          | 2 µL   | 0.4 ppm                | n.s. | n.s.                        | 600 – 1800                  | n.s.                | 785 nm<br>5s               | 8 cm <sup>-1</sup>   | -               | 2 mins   | -Spiked urine<br>-During the state from wet to dry, 20 spectra were obtained                               |
| 44 | Yu B.            | 2018 | Sensitive and simple determination of zwitterionic morphine in human urine based on liquid-liquid micro-extraction coupled with surface-enhanced Raman spectroscopy                             |  | SERS     | RSD                                                                        | n.s.                             | Au NRs                              | 50   | Morphine                                                                            | n.s.   | 1 ppm                  | -    | 4 °C then –80°C°C within 2h | 400 – 1800 cm <sup>-1</sup> | 5 min at 6000 rpm   | 785 nm<br>5s               | n.s.                 | -               | 6min     | Spiked Urine                                                                                               |
| 45 | C. Zhang         | 2018 | Detection and Quantification of Bucinnazine Hydrochloride Injection Based on SERS Technology                                                                                                    |  | SERS     | Boxcar averaging                                                           | Bwram 1.01.20                    | AgNPs                               | -    | Bucinnazine Hydrochlorid                                                            | 60 µL  | 0.5 µg/mL              | -    | -                           | 175 – 2000                  | -                   | 785 nm<br>75mW<br>5s       | 3 cm <sup>-1</sup>   | -               | n.s.     | Spiked Urine                                                                                               |
| 46 | S. Bindesri      | 2018 | Development of an electrochemical surface-enhanced Raman spectroscopy (EC-SERS) fabric-based plasmonic sensor for point-of-care diagnostics                                                     |  | SERS     | n.s.                                                                       | Origin 9.0                       | AgNPs                               | -    | Levofloxacin                                                                        | n.s.   | 0.1 M                  | -    | -                           | 200 – 1800                  | -                   | 785 nm<br>46.5 mW<br>30s   | 5 cm <sup>-1</sup>   | -               | n.s.     | Spiked Urine                                                                                               |
| 47 | D. Li            | 2018 | Griess reaction-based paper strip for colorimetric/fluorescent/SERS triple sensing of nitrite                                                                                                   |  | SERS     | n.s.                                                                       | n.s.                             | GNRs-Azo-GNPs                       | -    | Nitrite                                                                             | 10 µL  | 0.8 nM                 | n.s. | n.s.                        | 200 – 1000                  | n.s.                | 785 nm<br>10mW<br>10s      | 5 cm <sup>-1</sup>   | -               | n.s.     | Spiked Urine                                                                                               |
| 48 | Y. Lu            | 2018 | Diazotization-Coupling Reaction-Based Determination of Tyrosine in Urine Using AgNanocubes by Surface-Enhanced Raman Spectroscopy                                                               |  | SERS     | Recovery test                                                              | n.s.                             | AgNCs                               | -    | Tyrosine                                                                            | n.s.   | 10 <sup>-8</sup> M     | no   | -                           | 1000 – 1800                 | yes                 | 78 5nm<br>90 µW<br>0-1200s | n.s.                 | -               | n.s.     | -Morning urine<br>-Spiked Urine                                                                            |
| 49 | Y. Lu            | 2018 | Fabrication and Characterization of a Highly Sensitive Surface-Enhanced Raman Scattering Nanosensor for Detecting Glucose in Urine                                                              |  | SERS     | n.s.                                                                       | n.s.                             | Au@Ag NPs                           | -    | Glucose                                                                             | n.s.   | 0.1mM                  | n.s. | n.s.                        | 800 – 1800                  | n.s.                | 785 nm<br>0.34 mW<br>10s   | n.s.                 | -               | n.s.     | -Samples dry at room temperature<br>-Spiked Urine                                                          |
| 50 | N. Yamamoto      | 2018 | Ultrasonic standing wave preparation of a liquid cell for glucose measurements in urine by midinfrared spectroscopy and potential application to smart toilets                                  |  | NIR-FT   | - Standard deviation correlation<br>- Correlation coefficient              | n.s.                             | -                                   | 1    | Glucose                                                                             | n.s.   | 50 mg/dL               | no   | no                          | 714 – 1250                  | no                  | -                          | n.s.                 | -               | n.s.     | Spiked Urine                                                                                               |
| 51 | C. Zheng         | 2018 | Silver nanoparticles/activated carbon composite as a facile SERS substrate for highly sensitive detection of endogenous formaldehyde in human urine by catalytic reaction                       |  | SERS     | Liner correlation                                                          | n.s.                             | Ag NPs /AC composite                | 5    | Formaldehyde                                                                        | 10 µL  | 0.07 ppm               | n.s. | –70 °C                      | 400 – 4000                  | n.s.                | 633 nm<br>6mW<br>5s        | 2 cm <sup>-1</sup>   | -               | n.s.     | Morning urine                                                                                              |

|    |                |      |                                                                                                                                                                                                      |  |         |                                                                                     |                               |                                        |      |                                                                                                                       |         |                              |                                      |                                                |            |                          |                     |                      |                                                                                 |         |                                                                                                                     |
|----|----------------|------|------------------------------------------------------------------------------------------------------------------------------------------------------------------------------------------------------|--|---------|-------------------------------------------------------------------------------------|-------------------------------|----------------------------------------|------|-----------------------------------------------------------------------------------------------------------------------|---------|------------------------------|--------------------------------------|------------------------------------------------|------------|--------------------------|---------------------|----------------------|---------------------------------------------------------------------------------|---------|---------------------------------------------------------------------------------------------------------------------|
| 52 | J.E.L. Villa   | 2018 | Surface-enhanced Raman spectroscopy and MCR-ALS for the selective sensing of urinary adenosine on filter paper                                                                                       |  | SERS    | MCR-ALS                                                                             | n.s.                          | GNPs                                   | 3    | Adenosine                                                                                                             | 200 µL  | 3.8–4.9 µmol L <sup>-1</sup> | 0.45 µm                              | −4 °C                                          | 400 – 1800 | no                       | 785 nm 125 mW 20 s  | 0.05 mm              | -                                                                               | 6 min   | -                                                                                                                   |
| 53 | A. Stefancu    | 2018 | SERS-based quantification of albuminuria in the normal-to-mildly increased range                                                                                                                     |  | SERS    | - PCA-LDA<br>- PLSR                                                                 | Unscrambler X (CamoAnalytics) | Iodide modified AgNPs (IMNPs)          | 27   | Albumin                                                                                                               | 5 µL    | 3 µgm L <sup>-1</sup>        | no                                   | −20 °C                                         | 0 – 1700   | 5800g for 15 min         | 633 nm 30 mW 40s    | n.s.                 | -                                                                               | n.s.    | -                                                                                                                   |
| 54 | V. Turzhitsky  | 2018 | Pico analysis of Drugs in Biofluids with Quantitative Label-Free Surface-Enhanced Raman Spectroscopy                                                                                                 |  | SERS    | Semiempirical Quantitative Algorithm                                                | n.s.                          | Gold Nanoparticle                      | n.s. | Opiods                                                                                                                | 10 µL   | 100 ng mL <sup>-1</sup>      | n.s.                                 | n.s.                                           | 100 – 3100 | n.s.                     | 785 nm 200 mW       | 4-5 cm <sup>-1</sup> | -                                                                               | >2min*  | - Spiked Urine<br>- For concentrations <1000 ng mL <sup>-1</sup> the extraction procedure requires additional 20min |
| 55 | K. Mao         | 2018 | A novel biosensor based on AuAg core-shell nanoparticles for sensitive detection of methylamphetamine with surface enhanced Raman scattering                                                         |  | SERS    | Logarithm linear correlation                                                        | n.s.                          | Au@Ag                                  | n.s. | Methylamphetamine                                                                                                     | 100 µL  | 0.16 ppb                     | 0.22 µm                              | n.s.                                           | 800 – 1800 | n.s.                     | 532 nm 10s          | n.s.                 | Aqua regia (HCl/HNO3) and rinsed with ultrapure water throughout the experiment | n.s.    | Spiked Urine                                                                                                        |
| 56 | S. Feng        | 2017 | A non invasive cancer detection strategy based on gold nanoparticle surface-enhanced raman spectroscopy of urinary modified nucleosides isolated by affinity chromatography                          |  | SERS    | PLS-DA                                                                              | n.s.                          | AuNPs                                  | 169  | Modified nucleosides for nasopharyngeal cancer and esophageal cancer                                                  | n.s.    | -                            | no                                   | −4 °C                                          | 600 – 1700 | no                       | 785 nm 5mW 10s      | 2 cm <sup>-1</sup>   | -                                                                               | n.s.    | Samples were processed within 48 h after collection.                                                                |
| 57 | J. Wang        | 2017 | A nanoplasmonic label-free surface-enhanced Raman scattering strategy for non-invasive cancer genetic subtyping in patient samples                                                                   |  | SERS    | - PCA-LDA<br>- ROC analysis                                                         | SPSS 19.0                     | AgNPs                                  | 43   | - Simple nucleic acid (DNA/RNA)<br>- Prostate cancer                                                                  | 61 µL   | -                            | Yes (ZRC GF™)                        | n.s.                                           | 400 – 1800 | n.s                      | 785 nm 70mW 1 s     | n.s                  | n.s.                                                                            | ~2 h    | -                                                                                                                   |
| 58 | C. Westley     | 2017 | Absolute Quantification of Uric Acid in Human Urine Using Surface Enhanced Raman Scattering with the Standard Addition Method                                                                        |  | SERS    | Standard addition                                                                   | n.s.                          | Silver colloid                         | 58   | - Uric Acid<br>- Preeclampsia                                                                                         | 125 µL  | -                            | no                                   | n.s.                                           | 0 – 3000   | no                       | 633 nm 3 mW 20 s    | n.s.                 | -                                                                               | 140 s   | Clinical prepreclamptic patients provided urine samples collected between 11 and 14 weeks gestation                 |
| 59 | T. Mostowtt    | 2017 | Surface enhanced Raman spectroscopy (SERS) as a method for the toxicological analysis of synthetic cannabinoids                                                                                      |  | SERS    | n.s.                                                                                | n.s.                          | AgNPs                                  | -    | Synthetic cannabinoids                                                                                                | 10 µL   | 18 ng/ mL                    | -                                    | -                                              | 300 – 1800 | -                        | 785 nm 100 mW       | 4 cm <sup>-1</sup>   | -                                                                               | n.s.    | Spiked Urine                                                                                                        |
| 60 | L.P. Moreira   | 2017 | Raman spectroscopy applied to identify metabolites in urine of physically active subjects                                                                                                            |  | RS      | Lorentzian peak fitting function                                                    | Microcal Origin 6.0           | -                                      | 14   | Metabolites                                                                                                           | 80 µL   | -                            | no                                   | -20°C                                          | 400 – 1800 | no                       | 830nm 350mW 20s     | 2 cm <sup>-1</sup>   | -                                                                               | n.s.    | -                                                                                                                   |
| 61 | Premasiri W.R. | 2017 | Rapid urinary tract infection diagnostics by surface-enhanced Raman spectroscopy (SERS): identification and antibiotic susceptibilities                                                              |  | SERS    | PLS-DA                                                                              | Matlab                        | Au nanoparticle-covered SiO2 substrate | 12   | Bacterial identification                                                                                              | 50 µL   | -                            | 5-µm nylon mesh sheets (Cole-Palmer) | n.s.                                           | 400 – 1800 | 10000rpm for 20min       | 785 nm 0.45 mW 10s  | n.s.                 | -                                                                               | ~40 min | Spiked Urine                                                                                                        |
| 62 | A. Kamińska    | 2017 | Gold-capped silicon for ultrasensitive SERS-biosensing: Towards human biofluids analysis                                                                                                             |  | SERS    | - Savisky-Golay smoothing method<br>- Correlation Coefficient                       | n.s.                          | Au/Si surface                          | -    | - Cholesterol<br>- Uric acid<br>- Albumin<br>- Urea<br>- Phenylalanine tryptophan<br>- D-Galactosamine hydroxyproline | 15 µL   | n.s.                         | n.s.                                 | n.s.                                           | 600 – 1700 | n.s.                     | 785nm 5 mW 4-10s    | 5-6 cm <sup>-1</sup> | -                                                                               | n.s.    | -                                                                                                                   |
| 63 | M.K. Nguyen    | 2017 | A Plasmonic Coupling Substrate Based on Sandwich Structure of Ultrathin Silica-Coated Silver Nanocubes and Flower-Like Alumina-Coated Etched Aluminum for Sensitive Detection of Biomarkers in Urine |  | SERS    | Linear correlation                                                                  | n.s.                          | Ag@SiO2 NCs                            | -    | - Creatinine<br>- Flavin adenine dinucleotide                                                                         | 20 µL   | 5 ×10 <sup>-5</sup> M        | -                                    | 4 °C                                           | 500 – 1800 | -                        | 532 nm 1s 1.5 mW    | 1 cm <sup>-1</sup>   | -                                                                               | n.s.    | -                                                                                                                   |
| 64 | I. Gregório    | 2017 | Analysis of human bodily fluids on superabsorbent pads by ATR-FTIR                                                                                                                                   |  | ATR-FTR | n.s.                                                                                | OriginPro 8                   | -                                      | 3    | - Semen<br>- Vaginal fluid<br>- Urine                                                                                 | 0.05 mL | -                            | no                                   | n.s                                            | 800 – 2000 | no                       | -                   | 4 cm <sup>-1</sup>   | - isopropanol                                                                   | n.s.    | All stains were left to dry overnight in a biological safety cabinet (BSC) prior to analysis                        |
| 65 | M.C. Yu        | 2017 | Label Free Detection of Sensitive Mid-Infrared Biomarkers of Glomerulonephritis in Urine Using Fourier Transform Infrared Spectroscopy                                                               |  | ATR-FTR | - PCA<br>- one-way Analysis of Variance<br>- Fisher's Least Difference Significance | Origin Pro 9.1                | -                                      | 35   | Glomerulonephritis                                                                                                    | 5 µl    | -                            | no                                   | none (Analysis was done soon after collection) | 800 –4000  | 1800 rpm 4 °C for 10 min | -                   | 4 cm <sup>-1</sup>   | Distilled water and ethanol                                                     | n.s.    | Samples are dried on to the ATR prism surface with nitrogen gas                                                     |
| 66 | Q. Chena       | 2017 | Highly sensitive detection of glucose: A quantitative approach employing nanorods assembled plasmonic substrate                                                                                      |  | SERS    | n.s.                                                                                | n.s.                          | Au@Ag NRs                              | n.s. | Glucose                                                                                                               | n.s.    | 10 <sup>-8</sup> M           | n.s.                                 | n.s.                                           | 300 – 2500 | 5000rpm for 5min         | 633 nm 10s          | n.s.                 | -                                                                               | n.s.    | Spiked urine                                                                                                        |
| 67 | J. Chi         | 2017 | Surface-enhanced Raman scattering analysis of urine from deceased donors as a prognostic tool for kidney transplant outcome                                                                          |  | SERS    | - PCA-LDA<br>- Logistic regression<br>- Chi-square test                             | - Matlab<br>- SAS Software    | AgNPs                                  | 30   | Kidney injury                                                                                                         | 1.5 uL  |                              | no                                   | n.s                                            | 500 – 1800 | no                       | 632.8 nm 0.5 mW 20s | n.s.                 | -                                                                               | n.s.*   | * ca. <1min                                                                                                         |
| 68 | J. Menga       | 2017 | Designing of ordered two-dimensional gold nanoparticles film for cocaine detection in human urine using surface-enhanced Raman spectroscopy                                                          |  | SERS    | n.s                                                                                 | n.s.                          | GNPs                                   | n.s. | Cocaine                                                                                                               | 10 µL   | 500 ppb                      | n.s.                                 | n.s.                                           | 600 – 1800 | n.s.                     | 785nm 270mW 10 s    | n.s.                 | -                                                                               | 3 min   | Spiked Urine                                                                                                        |
| 69 | S. Jaychandran | 2016 | Raman Spectroscopic Analysis of Blood, Urine, Saliva and Tissue of Oral Potentially Malignant Disorders and Malignancy-A Diagnostic Study                                                            |  | RS      | PCA-LDA                                                                             | SPSS/PC +19                   | -                                      | 158  | Healthy, pre- and malignancy oral cancer patients                                                                     | n.s.    | -                            | n.s.                                 | n.s.                                           | 400 – 1800 | n.s.                     | 785 nm 100mW        | n.s.                 | -                                                                               | n.s.    | -                                                                                                                   |

|    |              |      |                                                                                                                                                                                      |  |          |                                                                                                                           |                                                                       |                       |     |                                                                  |           |                          |         |                                  |              |                         |                              |                        |                                  |                                                                                                                                      |                                                                                                                                                        |
|----|--------------|------|--------------------------------------------------------------------------------------------------------------------------------------------------------------------------------------|--|----------|---------------------------------------------------------------------------------------------------------------------------|-----------------------------------------------------------------------|-----------------------|-----|------------------------------------------------------------------|-----------|--------------------------|---------|----------------------------------|--------------|-------------------------|------------------------------|------------------------|----------------------------------|--------------------------------------------------------------------------------------------------------------------------------------|--------------------------------------------------------------------------------------------------------------------------------------------------------|
| 70 | Gok S.       | 2016 | Bladder cancer diagnosis from bladder wash by Fourier transform infrared spectroscopy as a novel test for tumor recurrence                                                           |  | ATR-FTIR | PCA<br>- Hierarchical cluster analysis<br>- Multivariate Analysis software<br>- Ward's algorithm<br>- Mann-Whitney U test | - Spectrum 100<br>- Unscrambler * X Version 10.3 (CAMO)<br>- OPUS 5.5 | -                     | 136 | Bladder cancer                                                   | n.s.      | -                        | no      | -80 °C                           | 4000 – 650   | 10000rpm for 30min      | -                            | 4 cm <sup>-1</sup>     | n.s.                             | - Liquid bladder wash samples taken from – 80 °C were thawed, directly put on the ATR crystal and scanned<br>- Di/ZnSe crystal plate |                                                                                                                                                        |
| 71 | Cheng J.     | 2016 | Highly Sensitive Detection of Clenbuterol in Animal Urine Using Immunomagnetic Bead Treatment and Surface-Enhanced Raman Spectroscopy                                                |  | SERS     | - Savitzky-Golay second derivative transformation<br>- Polynomial subtractions<br>- smoothing                             | RamanAnalyzer                                                         | GO/AuNPs              | 40  | Clenbuterol                                                      | 2 mL      | 0.5 ng·mL <sup>-1</sup>  | no      | 4 °C                             | 500 – 2500   | no                      | 785nm<br>200 mW<br>10 s      | 4 cm <sup>-1</sup>     | -                                | n.s.                                                                                                                                 | -                                                                                                                                                      |
| 72 | R. Colleen   | 2016 | Sheath flow SERS for chemical profiling in urine                                                                                                                                     |  | SERS     | Pearson correlation coefficient                                                                                           | Matlab                                                                | Ag surface            | -   | Benzoylcegonine                                                  | 1.5 µL    | 30 ng mL <sup>-1</sup>   | n.s.    | n.s.                             | 800 – 1800   | n.s.                    | 660 nm<br>3-4mW<br>200-250ms | n.s.                   | nanopure water and borate buffer | n.s.                                                                                                                                 | Spiked urine                                                                                                                                           |
| 73 | K.V. Oliver  | 2016 | Effects of the Hydration State on the Mid-Infrared Spectra of Urea and Creatinine in Relation to Urine Analyses                                                                      |  | FTIR     | Curve fitting analysis with Gaussian or pseudo-Voigt functions                                                            | - Origin 8.6<br>- Gaussian 09                                         | -                     | 5   | - Urea<br>- Creatinine                                           | 3 µL      | -                        | no      | No, fresh                        | 800 – 4000   | no                      | no                           | 4 cm <sup>-1</sup>     | - n.s.                           | <7min                                                                                                                                | Data were recorded at room temperature                                                                                                                 |
| 74 | Y.S. Selbe   | 2016 | Surface-enhanced Raman probe for rapid nano extraction and detection of erythropoietin in urine                                                                                      |  | SERS     | Relative standard deviation of calibration curve                                                                          | n.s.                                                                  | Au–Fe3O4 (MGNPs) GNRs | -   | Erythropoietin                                                   | 10 µL     | 0.1 pg mL <sup>-1</sup>  | n.s.    | n.s.                             | 200 – 2000   | n.s.                    | 785-nm<br>150mW<br>60s       | n.s.                   | -                                | n.s.*                                                                                                                                | - Spiked Urine<br>- Study, the cost < US\$30<br>- * total analysis time lasts around 2 days including particle generation and antibody immobilization. |
| 75 | P. She       | 2016 | A competitive immunoassay for ultrasensitive detection of Hg(2+) in water, human serum and urine samples using immunochromatographic test based on surface-enhanced Raman scattering |  | SERS     | n.s.                                                                                                                      | n.s.                                                                  | GNPs                  | -   | Mercury                                                          | 100 mL    | 0.45 pg mL <sup>-1</sup> | no      | n.s.                             | 0 – 2000     | no                      | 785nm<br>40 mW<br>5s         | n.s.                   | -                                | -                                                                                                                                    | Spiked Urine                                                                                                                                           |
| 76 | J.E.L. Villa | 2016 | A portable SERS method for the determination of uric acid using a paper-based substrate and multivariate curve resolution                                                            |  | SERS     | MCR-ALS                                                                                                                   | n.s.                                                                  | GNPs                  | -   | Uric acid                                                        | n.s.      | 0.11 mmolL <sup>-1</sup> | -       | -                                | 400 – 1800   | -                       | 785 nm<br>75W<br>1.5-2s      | 12-14 cm <sup>-1</sup> | -                                | 15- 80min                                                                                                                            | - Spiked Urine<br>- Substrates were dipped for 15 min and dried prior to analysis                                                                      |
| 77 | Y. Ma        | 2016 | Surface-Enhanced Raman Spectroscopy on Liquid Interfacial Nanoparticle Arrays for Multiplex Detecting Drugs in Urine                                                                 |  | SERS     | Linear relationship                                                                                                       | n.s.                                                                  | GNPs                  | -   | - Methamphetamine<br>- 3,4-Methylenedioxy methamphetamine (MDMA) | n.s.      | 0.5 ppm                  | no      | n.s.                             | 600 – 1300   | no                      | 633 nm<br>0.5 mW<br>5s       | n.s.                   | -                                | n.s                                                                                                                                  | - Spiked Urine<br>- Human urine was rapidly separated and purified in 3 min                                                                            |
| 78 | K.V. Oliver  | 2016 | Infrared vibrational spectroscopy: a rapid and novel diagnostic and monitoring tool for cystinuria                                                                                   |  | ATR-FTIR | - Pearson correlation coefficient<br>- Bland–Altman plot                                                                  | OPUS 6.5                                                              | -                     | 27  | Cystine                                                          | 5 µl      | 3 mM                     | no      | -20°C                            | 750 – 4000   | no                      | -                            | 4 cm <sup>-1</sup>     | n.s.                             | n.s.                                                                                                                                 | -Midstream urine collection<br>- Spectra recorded at room temperature<br>- Spectra of 'as-collected' undried urine                                     |
| 79 | Cassiano     | 2016 | Quantifying creatinine and urea in human urine through Raman spectroscopy aiming at diagnosis of kidney disease                                                                      |  | RS       | - PLS<br>- Correlation coefficient (r)<br>- Root mean square error of cross-validation                                    | - RamanSoft version 1.7<br>- Matlab 6.0<br>- Chemoface toolbox        | -                     | 54  | - Creatinine<br>- Urea                                           | 100 µL    | -                        | no      | -20 °C<br>(-78 °C for transport) | 400 – 1800   | no                      | 830nm<br>350mW<br>30s        | 2 cm <sup>-1</sup>     | -                                | n.s.                                                                                                                                 | Midstream urine                                                                                                                                        |
| 80 | K. Kinoshita | 2016 | Detection of urinary estrogen conjugates and creatinine using near infrared spectroscopy in Bornean orangutans (Pongo Pygmaeus)                                                      |  | NIR      | - PLS<br>- Savitzky–Golay second derivative                                                                               | - OPUS<br>- CAMO                                                      | -                     | 173 | - Estrogen<br>- Creatinine                                       | 100 µL    |                          | no      | -20°C                            | 4000 – 12500 | yes                     | -                            | 8 cm <sup>-1</sup>     | -                                | n.s.                                                                                                                                 | Spectra measured at room temperature (25 °C)                                                                                                           |
| 81 | X. Gu        | 2016 | Sensing Glucose in Urine and Serum and Hydrogen Peroxide in Living Cells by Use of a Novel Boronate Nanoprobe Based on Surface-Enhanced Raman Spectroscopy                           |  | SERS     | n.s.                                                                                                                      | Winspec 32                                                            | 3-MPBA - AuNPs        | -   | Glucose                                                          | 1-10 µL   | 70 nM                    | -       | -                                | 350 – 1700   | -                       | 785 nm<br>1.3mW<br>5s        | n.s.                   | -                                | <20min                                                                                                                               | Spiked Urine                                                                                                                                           |
| 82 | A. Subaihi   | 2016 | Rapid, Accurate, and Quantitative Detection of Propranolol in Multiple Human Biofluids via Surface-Enhanced Raman Scattering                                                         |  | SERS     | - PCA<br>- PC-DFA<br>- PLSR                                                                                               | n.s.                                                                  | AgNPs                 | -   | Propranolol                                                      | 200 µL    | 168.6 ng/mL (0.57 µM)    | no      | -80 C°                           | 400 – 2000   | 5000g at 4 °C for 10min | 785nm<br>60mW<br>20s         | n.s.                   | -                                | n.s.                                                                                                                                 | - Midstream first morning<br>- Spiked Urine<br>- urine briefly kept at 4 C°, frozen within 2h                                                          |
| 83 | I.J. Hidi    | 2016 | Lab-on-a-Chip-Surface Enhanced Raman Scattering Combined with the Standard Addition Method: Toward the Quantification of Nitroxoline in Spiked Human Urine Samples                   |  | SERS     | - Selective nonlinear iterative peak clipping<br>- MCR-ALS                                                                | Internal house written algoritmus (GnuR)                              | AgNPs                 | 10  | Nitroxoline                                                      | n.s.      | 3.43 µM (0.57 mg/L)      | 0.22 µm | -21 °C                           | 200 – 1650   | no                      | 532nm<br>13 mW<br>1s         | 1 cm <sup>-1</sup>     | -                                | n.s.                                                                                                                                 | -Spiked Urine<br>-Urine were kept in the freezer for 8 months before the measurements were performed.                                                  |
| 84 | K.M. Koo     | 2016 | Rapid and Sensitive Fusion Gene Detection in Prostate Cancer Urinary Specimens by Label-Free Surface-Enhanced Raman Scattering                                                       |  | SERS     | Calibration Curve                                                                                                         | n.s.                                                                  | AuNPs                 | 3   | TMPRSS2-ERG                                                      | 30-50 ml* | 10 <sup>3</sup> copies   | no      | n.s.                             | 600 – 1800   | 700g for 10min          | 785 nm<br>70 mW<br>1s        | n.s.                   | -                                | 75min**                                                                                                                              | -* for RNA Extraction procedure, 11µL volume for SERS<br>- **Extraction +SERS                                                                          |

|      |                |      |                                                                                                                                                             |  |        |                                                           |                                                                       |                      |      |                                          |             |                                                     |       |        |                                 |                         |                                                    |                                               |      |          |                                                                                                                                                                                 |
|------|----------------|------|-------------------------------------------------------------------------------------------------------------------------------------------------------------|--|--------|-----------------------------------------------------------|-----------------------------------------------------------------------|----------------------|------|------------------------------------------|-------------|-----------------------------------------------------|-------|--------|---------------------------------|-------------------------|----------------------------------------------------|-----------------------------------------------|------|----------|---------------------------------------------------------------------------------------------------------------------------------------------------------------------------------|
| 85   | K.M. Koo       | 2016 | Toward Precision Medicine: A Cancer Molecular Subtyping Nano-Strategy for RNA Biomarkers in Tumor and Urine                                                 |  | SERS   | Normalized Raman intensities for quantitative comparisons | n.s.                                                                  | AuNPs                | n.s. | RNA targets for Prostata Ca              | 100 µL      | ≈100 copies                                         | yes   | n.s.   | 400 – 1500                      | no                      | 785 nm<br>70w<br>2s                                | n.s.                                          | -    | 80 min*  | - *overall Time with sample preparation and RNA extration                                                                                                                       |
| 86   | B. Elumalai    | 2015 | Raman spectroscopic characterization of urine of normal and oral cancer subjects                                                                            |  | RS     | PCA-LDA                                                   | Labspec                                                               | -                    | 167  | Oral cancer                              | n.s.        | -                                                   | no    | 4 °C   | 500 – 1800                      | no                      | 785nm<br>13mW<br>90 s                              | n.s.                                          | -    | n.s.     | -First voided morning urine<br>-Samples thawed to room temperature<br>-The samples were examined within 48h                                                                     |
| 87   | G. Del Mistro  | 2015 | Surface-enhanced Raman spectroscopy of urine for prostate cancer detection: a preliminary study                                                             |  | SERS   | PCA-LDA                                                   | - hyperSpec package<br>- R                                            | AuNPs                | 18   | Prostata cancer                          | 5 µL        | -                                                   | 3 kDa | –80 °C | 400 – 1800                      | 4000g at 4 °C for 15min | 85nm<br>10 s<br>120 mW                             | n.s.                                          | -    | n.s.     | -Morning urine samples<br>-Samples frozen within 5h<br>-Urine samples thawed at 37 °C in water bath                                                                             |
| 88   | J. Chi         | 2015 | Use of surface-enhanced Raman scattering as a prognostic indicator of acute kidney transplant rejection                                                     |  | SERS   | n.s.                                                      | OriginPro 8.5                                                         | AgNPs                | 58   | Acute kidney transplant rejection        | n.s.        | -                                                   | n.s.  | –80°C  | 300 – 2000                      | n.s.                    | 632.8 nm<br>5mw<br>20s                             | n.s.                                          | -    | n.s.     | -                                                                                                                                                                               |
| 89   | U.C. Schröder  | 2015 | Rapid, culture-independent, optical diagnostics of centrifugally captured bacteria from urine samples                                                       |  | RS     | n.s.                                                      | - R<br>- hyperSpec and “cbmodels Package<br>- MATLAB<br>- PLS toolbox | -                    | -    | Bacteria                                 | 4 µL        | -                                                   | 5nm   | n.s.   | 300 – 1800                      | 11500g for 5min         | 532nm<br>35mw<br>5s                                | n.s.                                          | -    | 100 min* | * Total duration of all of the above process steps, from the initial arrival of the patient sample into the lab, to the identification of the pathogen using Raman spectroscopy |
| 90   | M. Li          | 2015 | Reagent- and separation-free measurements of urine creatinine concentration using stamping surface enhanced Raman scattering (S-SERS)                       |  | S-SERS | n.s.                                                      | - Winspec<br>- MATLAB                                                 | Nanoporous gold disk | -    | Creatinine                               | 1 µL        | 0.68 mg/dl                                          | no    | n.s.   | 550 – 1650                      | no                      | 785nm<br>30 mW<br>20sec                            | n.s.                                          | -    | 1h*      | *The entire assay from warming up reagents to room temperature to calculating creatinine concentration                                                                          |
| 91   | O. Alharbi     | 2015 | Detection and quantification of the opioid tramadol in urine using surface enhanced Raman scattering                                                        |  | SERS   | n.s                                                       | - DeltaNu<br>- NuSpec                                                 | Silver hydroxylamine | -    | Tramadol                                 | n.s.        | 2.5 × 10 <sup>-6</sup> (657.5 ng mL <sup>-1</sup> ) | -     | -      | 200 -2000 (potentially 0 -3500) | -                       | 633 nm<br>30 mW                                    | 8 cm <sup>-1</sup>                            | -    | n.s.     | -                                                                                                                                                                               |
| 92   | R. Dong        | 2015 | Detection and Direct Readout of Drugs in Human Urine Using Dynamic Surface-Enhanced Raman Spectroscopy and Support Vector Machines                          |  | SERS   | - SVM<br>- Radial basis function<br>- PCA                 | MATLAB                                                                | GNRs                 | 53   | - MAMP<br>- MDMA                         | 2 µL        | 0.1 ppm                                             | no    | n.s.   | 600 – 1800                      | no                      | 785nm<br>3.5 mW<br>3s<br>/<br>785nm<br>120mW<br>5s | n.s.                                          | -    | 2min     | -                                                                                                                                                                               |
| 93   | Z. Han         | 2015 | Portable Kit for Identification and Detection of Drugs in Human Urine Using Surface-Enhanced Raman Spectroscopy                                             |  | SERS   | RSD                                                       | n.s.                                                                  | GNRs                 | 30   | - MAMP<br>- MDMA                         | 2 µL        | 0.1 ppm                                             | no    | n.s.   | 200 – 2000                      | no                      | 785 nm<br>100 mW<br>15 s                           | n.s                                           | -    | ca. 5min |                                                                                                                                                                                 |
| 94   | Z. Han         | 2015 | Three-Dimensional Surface-Enhanced Raman Scattering Hotspots in Spherical Colloidal Superstructure for Identification and Detection of Drugs in Human Urine |  | SERS   | - SVM<br>- PCA                                            | n.s.                                                                  | AgNPs                | 4    | Methamphetamine                          | 1 µL        | 10 ppb                                              | n.s.  | n.s.   | 600 – 1250                      | 10000 rpm for 2min      | n.s.                                               | n.s.                                          | -    | n.s.*    | -*> 5min                                                                                                                                                                        |
| 95   | S. Clauson     | 2015 | Detection of Pesticides and Metabolites Using Surface-Enhanced Raman Spectroscopy (SERS): Acephate                                                          |  | SERS   | n.s.                                                      | - Grams AI<br>- Grams IQ<br>- Origin 8.5                              | Ag Active Surface    | -    | Acephate                                 | 0.4 or 5 µL | 1ppb                                                | n.s.  | n.s.   | 200 – 3400                      | n.s.                    | 785-350nm<br>150mW<br>/<br>785nm<br>120 mW         | 1 cm <sup>-1</sup>                            | -    | <1min*   | -Spiked Urine<br>- *only spectra acquisition                                                                                                                                    |
| 96   | E.L. Doctor    | 2015 | The application of supported liquid extraction in the analysis of benzodiazepines using surface enhanced Raman spectroscopy                                 |  | SERS   | - Linear dynamic ranges<br>- Calibration curves           | n.s.                                                                  | Au colloids          | -    | Benzodiazepines                          | n.s.        | 32ng/mL                                             | -     | -      | 400 – 1800                      | -                       | 785nm<br>10 s<br>100 mW                            | n.s.                                          | -    | < 20min  | Spiked Urine                                                                                                                                                                    |
| 97   | R.A. Karaballi | 2015 | Development of an electrochemical surface-enhanced Raman spectroscopy (EC-SERS)aptasensor for direct detection of DNA hybridization                         |  | SERS   | n.s.                                                      | Origin 8.1                                                            | AgNPs                | -    | DNA hybridization                        | 10 µL       | 280 mg mL <sup>-1</sup>                             | -     | -      | 200 – 2000                      | -                       | 780 /785 nm<br>22.3-55.9 mW<br>30-60s              | 5 cm <sup>-1</sup><br>/<br>3 cm <sup>-1</sup> | -    | n.s.     | -                                                                                                                                                                               |
| 98   | T. Yang        | 2014 | Facile and Label-Free Detection of Lung Cancer Biomarker in Urine by Magnetically Assisted Surface-Enhanced Raman Scattering                                |  | SERS   | - Student t test<br>- Student’s t-values                  | n.s.                                                                  | Fe3O4/Au/Ag NPs      | 3    | Adenosine                                | 5 µL        | 0.1 µM                                              | no    | n.s,   | 500 – 1800                      | 10000rpm for 10min      | 632.8nm<br>5mW<br>/<br>785nm<br>300mW              | n.s.                                          | -    | n.s.     | -Spiked Urine<br>-Samples equilibrate for 30 min at room temperature                                                                                                            |
| 99   | I. Syed        | 2014 | Quantitation of urea in urine by Fourier transforms infrared spectroscopy                                                                                   |  | FTIR   | Linear relationship                                       | n.s.                                                                  | -                    | -    | Urea                                     | n.s.        | 1.25 µg/mL                                          | no    | n.s.   | 400 – 4000                      | no                      | -                                                  | 4 cm <sup>-1</sup>                            | n.s. | 32s*     | - Spiked Urine<br>- *scanning Time                                                                                                                                              |
| 100  | K.V. Kong      | 2014 | A Rapid and Label-free SERS Detection Method for Biomarkers in Clinical Biofluids                                                                           |  | SERS   | PCA                                                       | Matlab 7.0                                                            | BMFON chips          | 9    | - Bladder cancer<br>- Alpha-1 Antitrypsi | 10 µL       | -                                                   | n.s.  | –20 °C | 1000 – 2400                     | n.s.                    | 633nm<br>10 s<br>6.2 mW                            | 3 cm <sup>-1</sup>                            | -    | n.s.     | Samples were incubated for 1 h with the anti-A1AT                                                                                                                               |
| 1001 | K.V. Kong      | 2014 | Sensitive SERS-pH sensing in biological media using metal carbonyl functionalized planar substrates                                                         |  | SERS   | n.s.                                                      | WiRE3.0 software                                                      | AuNPs                | -    | pH                                       | 20 µL       | -                                                   | n.s.  | -20 °C | 100 – 2200                      | n.s.                    | 633nm<br>0.6 mW<br>10s                             | n.s.                                          | -    | n.s.     | Spiked Urine                                                                                                                                                                    |

|     |                   |      |                                                                                                                                                                                                                                  |  |                  |                                                  |                            |                                    |      |                                                                                                                                                                                                                                                                                                                |              |                               |               |        |                                                     |                     |                             |                     |      |       |                                                                                                                  |
|-----|-------------------|------|----------------------------------------------------------------------------------------------------------------------------------------------------------------------------------------------------------------------------------|--|------------------|--------------------------------------------------|----------------------------|------------------------------------|------|----------------------------------------------------------------------------------------------------------------------------------------------------------------------------------------------------------------------------------------------------------------------------------------------------------------|--------------|-------------------------------|---------------|--------|-----------------------------------------------------|---------------------|-----------------------------|---------------------|------|-------|------------------------------------------------------------------------------------------------------------------|
| 102 | M.T. Alua         | 2014 | Photochemical decoration of magnetic composites with silver nanostructures for determination of creatinine in urine by surface-enhanced Raman spectroscopy                                                                       |  | SERS             | Linear correlation                               | n.s.                       | Ag@ZnO/Fe3O4                       | -    | Creatinine                                                                                                                                                                                                                                                                                                     | n.s.         | 25 nM                         | n.s.          | n.s.   | 400 – 1800                                          | n.s.                | 632.8-nm 35mW 5s            | n.s.                | -    | n.s.  | -                                                                                                                |
| 103 | M. Li             | 2014 | Ultrasensitive and Quantitative Detection of a New $\beta$ -Agonist Phenylethanolamine A by a Novel Immunochromatographic Assay Based on Surface-Enhanced Raman Scattering (SERS)                                                |  | SERS             | Recovery Test                                    | n.s.                       | Au@Ag                              | -    | $\beta$ -Agonist Phenylethanolamine                                                                                                                                                                                                                                                                            | n.s.         | 0.32 pg mL <sup>-1</sup>      | n.s.          | no     | 500 – 2000                                          | n.s.                | 785nm 20 mW 10 s            | n.s.                | -    | n.s.* | *>15min                                                                                                          |
| 104 | L. Zhao           | 2014 | Quantitative Detection of Uric Acid by Electrochemical-SurfaceEnhanced Raman Spectroscopy Using a Multilayered Au/AgSubstrate                                                                                                    |  | SERS             | - Linear regression analysis<br>- Relative Error | n.s.                       | Au/Ag substrate                    | -    | Uric Acid                                                                                                                                                                                                                                                                                                      | 2 $\mu$ L    | 0.1 M                         | -             | -      | 200 – 1800                                          | -                   | 532 nm. 1mW 30 s            | 3 cm <sup>-1</sup>  | -    | n.s.  | -                                                                                                                |
| 105 | K.V. Kong         | 2014 | Sensitive SERS glucose sensing in biological media using alkyne functionalized boronic acid on planar substrates                                                                                                                 |  | SERS             | n.s.                                             | WiRE3.0                    | Au/Ag polystyrene                  | -    | Glucose                                                                                                                                                                                                                                                                                                        | n.s.         | 100 $\mu$ M                   | n.s.          | -20 °C | 500 – 2300                                          | n.s.                | 785nm 300 mW 10s            | n.s.                | -    | n.s.  | -                                                                                                                |
| 106 | G. Cao            | 2014 | Quantification of an exogenous cancer biomarker in urinalysis by Raman Spectroscopy                                                                                                                                              |  | SERS             | n.s.                                             | n.s.                       | $\beta$ -CD functionalized Klarite |      | Acetyl amantadine (AcAm)                                                                                                                                                                                                                                                                                       | n.s.         | 1 ng mL <sup>-1</sup>         | -             | -      | 0 – 2000                                            | -                   | 785 nm 23 mW 30s            | n.s.                | -    | n.s.  | -                                                                                                                |
| 107 | M.B. Mamián-López | 2013 | Quantification of moxifloxacin in urine using surface-enhanced Raman spectroscopy (SERS) and multivariate curve resolution on a nanostructured gold surface                                                                      |  | SERS             | - MCR-ALS<br>- Savitzky-Golay second derivative  | n.s.                       | Nanostructured gold substrate      | 3    | Moxifloxacin                                                                                                                                                                                                                                                                                                   | 0.50 $\mu$ L | 0.26 $\mu$ g mL <sup>-1</sup> | 0.22- $\mu$ m | no     | 200 – 2200                                          | no                  | 785 nm 250mW 8 s            | 4 cm <sup>-1</sup>  | -    | n.s.  | Early morning urine                                                                                              |
| 108 | A.R. Khaskheli    | 2013 | Estimation of ibuprofen in urine and tablet formulations by transmission Fourier Transform Infrared spectroscopy by partial least square                                                                                         |  | FTIR             | - PLS<br>- RMSEC<br>- RMSECV<br>- RMSEP          | OMNIC 7.3                  | -                                  | -    | Ibuprofen                                                                                                                                                                                                                                                                                                      | n.s.         | 0.77 lg mL <sup>-1</sup>      | n.s.          | n.s.   | 400 – 4000                                          | n.s.                | -                           | 4 cm <sup>-1</sup>  | n.s. | n.s.  | -Urine samples were collected from healthy volunteers after 2 h the dose of an ibuprofen tablet<br>-Spiked urine |
| 109 | B.L. Goodall      | 2013 | Electrochemical-surface enhanced Raman spectroscopy(E-SERS) of uric acid: a potential rapid diagnostic method for early preeclampsia detection                                                                                   |  | n.s.             | n.s.                                             | n.s.                       | Ag NPs                             | -    | Uric acid                                                                                                                                                                                                                                                                                                      | n.s.         | <1mM                          | -             | -      | 200 – 2000                                          | -                   | 785nm 46.5 mW 30s           | n.s.                | -    | n.s.  | -                                                                                                                |
| 110 | R. Huang          | 2013 | Detection of tobacco-related biomarkers in urine samples by surface-enhanced Raman spectroscopy coupled with thin-layer chromatography                                                                                           |  | SERS             | Calibration curve                                | n.s.                       | AgNPs                              | -    | Trans-3'hdroxycotinine (3HC)                                                                                                                                                                                                                                                                                   | 5 $\mu$ L    | 10 nM                         | n.s.          | n.s.   | 200 – 2000                                          | 2500rpm for 15min   | 514 - 647 - 785nm 10 mW 10s | n.s.                | -    | n.s.  | Spiked Urin                                                                                                      |
| 111 | E.L. Doctor       | 2013 | Comparison of aggregating agents for the surface-enhanced Raman analysis of benzodiazepines                                                                                                                                      |  | SERS             | Calibration curve                                | n.s.                       | Gold colloids                      | -    | Benzodiazepines                                                                                                                                                                                                                                                                                                | 10 $\mu$ L   | 2.5 ng mL <sup>-1</sup>       | n.s           | n.s    | 400 – 1800                                          | n.s.                | 785nm 100 mW 10s            | n.s.                | -    | n.s.  | Spiked Urin                                                                                                      |
| 112 | U.C. Schröder     | 2013 | Combined Dielectrophoresis–Raman Setup for the Classification of Pathogens Recovered from the Urinary Tract                                                                                                                      |  | DEP-RS           | - LDA<br>- PCA                                   | - R<br>- HyperSpec Package | -                                  | 3    | Bacteria                                                                                                                                                                                                                                                                                                       | 200 $\mu$ L  |                               | 2.7 $\mu$ m   | n.s.   | 600 – 1800                                          | 11500g for 5min     | 532nm 15mW 10s              | n.s.                | -    | 35min | -                                                                                                                |
| 113 | S. Kloss          | 2013 | Culture Independent Raman Spectroscopic Identification of Urinary Tract Infection Pathogens: A Proof of Principle Study                                                                                                          |  | Raman-microscopy | SVM                                              | R                          | -                                  | 10   | - Enterococcus faecalis<br>- Enterococcus faecium<br>- Staphylococcus epidermidis<br>- Staphylococcus haemolyticus<br>- Staphylococcus hominis<br>- Staphylococcus saprophyticus<br>- Staphylococcus aureus<br>- Escherichia coli<br>- Klebsiella pneumoniae<br>- Pseudomonas aeruginosa<br>- Proteus mirabili | 4 $\mu$ L    |                               | no            | n.s.   | 70 – 3319                                           | 10000g for 5min     | 532nm 7mW 6-10sec           | 10 cm <sup>-1</sup> | -    | 2h    | -                                                                                                                |
| 114 | J.A.M. Bispo      | 2013 | Correlating the amount of urea, creatinine, and glucose in urine from patients with diabetes mellitus and hypertension with the risk of developing renal lesions by means of Raman spectroscopy and principal component analysis |  | SERS             | PCA                                              | n.s.                       | -                                  | 70   | - Urea<br>- Creatinine<br>- Glucose                                                                                                                                                                                                                                                                            | 100 $\mu$ L  | -                             | no            | -20°C  | 600 – 1800 (potentially 400-1800 cm <sup>-1</sup> ) | no                  | 830 nm 300 mW 20s           | n.s.                | -    | n.s.  | Morning, fasting urine                                                                                           |
| 115 | K. Kinoshita      | 2012 | Spectral pattern of urinary water as a biomarker of estrus in the giant panda                                                                                                                                                    |  | NIR              | PLSR                                             | n.s.                       | -                                  | n.s. | Estrus                                                                                                                                                                                                                                                                                                         | n.s.         |                               | no            | -40°C  | 14700 – 4000                                        | 650g for 4 min      | -                           | 2 nm                | n.s. | n.s.  | -                                                                                                                |
| 116 | Shapiro A.        | 2011 | Raman Molecular Imaging: A Novel Spectroscopic Technique for Diagnosis of Bladder Cancer in Urine Specimens                                                                                                                      |  | RMI              | PCA                                              | n.s.                       | -                                  | 340  | - Bladder Cancer<br>- voided urinary cells                                                                                                                                                                                                                                                                     | n.s.         | -                             | 20 $\mu$ m    | n.s.   | 693 –1800 (potentially 350 – 3600)                  | 2x 3000rpm for 5min | 532 nm                      | n.s.                | -    | n.s.  | -                                                                                                                |
| 117 | G. Li             | 2011 | Research on the Measurement of Urinary Albumin by Visible-Near Infrared Spectroscopy                                                                                                                                             |  | NIR              | PLS                                              | n.s.                       | -                                  | 207  | Albumin                                                                                                                                                                                                                                                                                                        | n.s.         | n.s.                          | n.s.          | n.s.   | n.s.                                                | n.s.                | n.s.                        | n.s.                | n.s. | n.s.  | Paper is only available in the Chinese language.                                                                 |
| 118 | F. Zhai           | 2011 | Rapid Determination of Ractopamine in Swine Urine Using Surface-Enhanced Raman Spectroscopy                                                                                                                                      |  | SERS             | - PLS<br>- PCA                                   | n.s.                       | Gold-coated Klarite                | 240  | Ractopamine                                                                                                                                                                                                                                                                                                    | n.s.         | 0.4 $\mu$ g mL <sup>-1</sup>  | no            | -20 °C | 600 – 1800                                          | 5000rpm for 5min    | 780 n 10mW 20s              | 5 cm <sup>-1</sup>  | -    | n.s   | Samples kept frozen at - 20 °C < 1 week                                                                          |
| 119 | K. Kinoshita      | 2010 | Near infrared spectroscopy of urine proves useful for estimating ovulation in giant panda (Ailuropoda melanoleuca)                                                                                                               |  | NIR              | - SIMCA                                          | SPSS Version 10.0          | -                                  | 53   | Estrone-3-glucuronide (E1G)                                                                                                                                                                                                                                                                                    | n.s.         | -                             | no            | -40°C  | 4100 – 9100                                         | 650g for 4 min      | -                           | 8 cm <sup>-1</sup>  | n.s. | n.s.  | Each sample was warmed up to 37 °C in water bath                                                                 |

|             |                |      |                                                                                                                                               |  |  |                                       |                                                                                            |                     |             |      |                                                                |                                          |                                               |                       |        |                                                        |      |                             |                       |                                |        |                                                                                                                                                |
|-------------|----------------|------|-----------------------------------------------------------------------------------------------------------------------------------------------|--|--|---------------------------------------|--------------------------------------------------------------------------------------------|---------------------|-------------|------|----------------------------------------------------------------|------------------------------------------|-----------------------------------------------|-----------------------|--------|--------------------------------------------------------|------|-----------------------------|-----------------------|--------------------------------|--------|------------------------------------------------------------------------------------------------------------------------------------------------|
|             |                |      |                                                                                                                                               |  |  | - Moving principal component analysis |                                                                                            |                     |             |      |                                                                |                                          |                                               |                       |        |                                                        |      |                             |                       |                                |        |                                                                                                                                                |
| 1<br>2<br>0 | H. Wang        | 2010 | Quantitative analysis of creatinine in urine by metalized nanostructured parylene                                                             |  |  | SERS                                  | Linear correlation                                                                         | n.s.                | Ag-parylene | 11   | Creatinine                                                     | 5 µL                                     | 0.5 µg/mL                                     | no                    | −80 °C | 400 – 1800                                             | no   | 632.8 nm<br>35mW<br>10s     | n.s                   | -                              | n.s.   | The surfaces of SERS substrates were treated by a UV-Ozone cleaner for 2 min, then urine sample was added onto the substrate and let air dried |
| 1<br>2<br>1 | W. Liu         | 2008 | Use of Artificial Neural Networks in Near-Infrared Spectroscopy Calibrations for Predicting Glucose Concentration in Urin                     |  |  | NIR                                   | - PLS<br>- PCA<br>- Artificial neural network                                              | n.s.                | -           | -    | Glucose                                                        | A quartz cell with a path length of 1 mm | -                                             | no                    | n.s.   | 4000 – 10000                                           | n.s. | 100W                        | 2-4 cm <sup>-1</sup>  | 3–4 times with distilled water | n.s.   | -                                                                                                                                              |
| 1<br>2<br>2 | K.W. Kho       | 2008 | Polymer-based microfluidics with surface-enhanced Raman-spectroscopy-active periodic metal nanostructures for biofluid analysis               |  |  | SERS                                  | n.s.                                                                                       | n.s.                | Au Colloid  | 1    | Spectra enhancement                                            | 2ml                                      | -                                             | n.s                   | n.s    | 400 – 2000                                             | n.s  | 632.8 nm<br>3.5mW<br>200s   | n.s.                  | -                              | n.s.   | -                                                                                                                                              |
| 1<br>2<br>3 | D. Qi          | 2007 | Chemical concentration measurement in blood serum and urine samples using liquid-core optical fiber Raman spectroscopy                        |  |  | LCOF-RS                               | - PLS<br>- Leave one out cross-validation<br>- Root-Mean-Squares Error of Cross-Validation | n.s.                | -           | 61   | - Urea<br>- Creatinine                                         | 3ml                                      | -                                             | no                    | 4°C    | 800 – 1600                                             | no   | 830 nm<br>160 mW<br>2s      | 7-13 cm <sup>-1</sup> | -                              | n.s.   | -                                                                                                                                              |
| 1<br>2<br>4 | C.S. Park      | 2007 | Classification of glucose concentration in diluted urine using the low-resolution Raman spectroscopy and kernel optimization methods          |  |  | LRRS                                  | - Kernel-based learning<br>- SVM<br>- PLS                                                  | n.s.                | -           | 3    | Glucose                                                        | n.s.                                     | -                                             | no                    | n.s.   | 200 – 2800                                             | no   | 785nm<br>100mW<br>20s       | 15 cm <sup>-1</sup>   | -                              | n.s.   | Spiked urine                                                                                                                                   |
| 1<br>2<br>5 | Y.E. Kim       | 2006 | Evaluation of Fourier transform near-infrared spectrometer for determination of oxalate in standard urinary solution                          |  |  | NIR-FT                                | - PCR<br>- PLSR<br>- MLR                                                                   | n.s.                | -           | 80   | Oxalate                                                        | n.s.                                     | 10 mg/l                                       | no                    | -      | 4000 – 12800                                           | no   | -                           | 0.5 nm                | n.s.                           | n.s.   | Spiked urine                                                                                                                                   |
| 1<br>2<br>6 | A.E. Guimarães | 2006 | Near Infrared Raman Spectroscopy (NIRS): A technique for doping control                                                                       |  |  | NIR-RS                                | Linear correlation                                                                         | n.s.                | -           | 5    | Ephedrine                                                      | 1 ml                                     | 4.8 µg/ml                                     | no                    | -      | 700 – 1700                                             | no   | 785nm<br>70 mW<br>100 s     | 5 cm <sup>-1</sup>    | n.s.                           | n.s.   | Spectra obtained within one hour after collection                                                                                              |
| 1<br>2<br>7 | S. Tanaka      | 2006 | Feasibility Study of a Urine Glucose Level Monitor for Home Healthcare Using Near Infrared Spectroscopy                                       |  |  | NIR-FT                                | - PLS<br>- Leave-one-out cross validation method<br>- Standard Error of Calibration        | Matlab              | -           | 164  | Glucose                                                        | n.s.                                     | n.s.                                          | no                    | n.s.   | 4000 – 9000                                            | no   | -                           | n.s.                  | n.s.                           | n.s.   | -                                                                                                                                              |
| 1<br>2<br>8 | C.S. Park      | 2006 | Urine analysis in diluted situation using low-resolution Raman spectroscope                                                                   |  |  | LRRS                                  | - Data acquisition program using MFC<br>- PLS<br>- PCA<br>- RMSEP                          | Matlab R13          | -           | 1    | Glucose                                                        | 200ml                                    | 5mg/dl                                        | no                    | no     | 0 – 1800                                               | no   | 785 nm<br>40mW              | n.s.                  | -                              | n.s    | -                                                                                                                                              |
| 1<br>2<br>9 | T.L. Wang      | 2005 | Semi-quantitative Surface Enhanced Raman Scattering Spectroscopic Creatinine Measurement in Human Urine Samples                               |  |  | SERS                                  | Linear correlation                                                                         | LabSpec             | Au colloid  | 13   | Creatinine                                                     | 50 µl                                    | 2.56 mg/dl                                    | no                    | 4 °C   | 400 – 1700                                             | no   | 632.8nm,<br>mW n.s.<br>20 s | 1 cm <sup>-1</sup>    | -                              | n.s.   | - Urine samples were taken out from the refrigerator and returned to 22°C.<br>- Spiked Urine<br>- Spectra obtained few hours after collection. |
| 1<br>3<br>0 | D. Qi          | 2005 | Quantitative concentration measurements of creatinine dissolved in water and urine using Raman spectroscopy and a liquid core optical fiber   |  |  | LCOF- RS                              | - PLS<br>- Leave-one-out cross validation                                                  | Matlab              | -           | 42   | Creatinine                                                     | 1–3 mL for Cuvette/<br>200 µL fur LCOF   |                                               | no                    | n.s.   | 600 – 1200                                             | no   | 830nm<br>1s                 | n.s.                  | n.s.                           |        | Samples were stored in a refrigerator and used within 4 days                                                                                   |
| 1<br>3<br>1 | W. Liu         | 2005 | Determination of Multiple Components in Urine Using FT-MIR, NIR and FT-Raman Spectroscopic Technique                                          |  |  | FT-MIR, NIR, FT-RS                    | - PLS<br>- RMSEP                                                                           | n.s.                | -           | n.s. | - Glucose<br>- Albumin                                         | n.s.                                     | n.s.                                          | n.s.                  | n.s.   | FTMIR 4000 – 400<br>NIR 370 – 15000<br>FTRS 300 – 4000 |      | 350mW                       | 2 cm <sup>-1</sup>    | n.s.                           | n.s.   | -                                                                                                                                              |
| 1<br>3<br>2 | S.H. Chung     | 2005 | Application of independent component analysis (ICA) method to the Raman spectra processing                                                    |  |  | RS                                    | ICA by Maximum Likelihood (ML) fast fixed-point estimation algorithm                       | n.s.                | -           | 18   | - Glucose<br>- Creatinine<br>- Urea nitrogen<br>- Uric acid    | n.s.                                     | n.s.                                          | no                    | -      | 50 – 2900                                              | no   | 785nm<br>100mW              | 15 cm <sup>-1</sup>   | -                              | n.s.   | ?                                                                                                                                              |
| 1<br>3<br>3 | P.A. Susmel    | 2004 | Prediction of Purine Derivatives, Creatinine and Total Nitrogen Concentrations in Urine by FT-Near-Infrared Reflectance Spectroscopy (FT-NIR) |  |  | NIR-FT                                | PCR                                                                                        | Spectrum Quant+4.51 | -           | 180  | - Allantoin<br>- Uric acid<br>- Creatinine<br>- Total Nitrogen | 100 µl                                   | 0.048 g/l<br>0.011g/l<br>0.06 g/l<br>0.94 g/l | Yes<br>(filter paper) | n.s.*  | 4000 – 7000                                            | no   | -                           | 2 cm <sup>-1</sup>    | n.s.                           | <30sec | Samples were analysed fresh or after be frozen for a few days                                                                                  |
| 1<br>3<br>4 | W.R. Li        | 2003 | Direct spectrometric determination of proteins in body fluids using a near-infrared cyanine dye                                               |  |  | NIR                                   | Recovery test                                                                              | n.s.                | -           | n.s. | Total proteins                                                 | 0.05 mL                                  | 20 ngmL–1                                     | no                    | n.s.   | 11100 – 20000                                          | no   | -                           | n.s.                  | -                              | n.s.   | -                                                                                                                                              |

|             |                       |      |                                                                                                                                                     |          |                                                                                               |                 |                |      |                                                                                                    |        |                                                                             |         |        |                                     |    |                          |                    |                                                                                                                                   |       |                                                                            |
|-------------|-----------------------|------|-----------------------------------------------------------------------------------------------------------------------------------------------------|----------|-----------------------------------------------------------------------------------------------|-----------------|----------------|------|----------------------------------------------------------------------------------------------------|--------|-----------------------------------------------------------------------------|---------|--------|-------------------------------------|----|--------------------------|--------------------|-----------------------------------------------------------------------------------------------------------------------------------|-------|----------------------------------------------------------------------------|
| 1<br>3<br>5 | J.W. McMurdy          | 2003 | Raman Spectroscopy-Based Creatinine Measurement in Urine Samples from a Multipatient Population                                                     | RS       | - Hybrid linear analysis calibration<br>- PLS<br>- Leave-one-out cross-validation<br>- RMSECV | n.s.            | -              | 19   | Creatinine                                                                                         | n.s    | 24 mg/dL                                                                    | no      | n.s.   | 500 – 1800                          | no | 830nm<br>200 mW<br>900 s | 5 cm <sup>-1</sup> | -                                                                                                                                 | n.s.  | Samples were kept at 7°C and measured within few days                      |
| 1<br>3<br>6 | S. Cystron            | 2003 | Fiberoptic infrared spectroscopy: a Novel tool for the analysis of urine and urinary salts in situ in real time                                     | FTIR     | Calibration curves                                                                            | n.s.            | -              | 48   | Salts                                                                                              | 5mL    | Phosphate 5mmol/L;<br>Carbonate 8mmol/L;<br>Oxalate 6mmol/L; Urate 3mmol/L. | no      | no     | 900 – 1700 (potentially 800 – 4000) | no | -                        | 4 cm <sup>-1</sup> | n.s.                                                                                                                              | -     |                                                                            |
| 1<br>3<br>7 | R. Somorjai           | 2002 | Distinguishing normal from rejecting renal allografts: application of a three Stage classification strategy to MR and IR spectra of urine           | FTIR     | - Feature space reduction<br>- Optimal region selector<br>- Genetic algoritms                 | n.s.            | -              | 68   | Rejecting renal allografts                                                                         | 12 ml  | -                                                                           | no      | n.s.   | 800 – 5000                          | no | -                        | 4 cm <sup>-1</sup> | n.s.                                                                                                                              | n.s.  | -                                                                          |
| 1<br>3<br>8 | L. Pezzaniti          | 2001 | Preliminary investigation of near-infrared spectroscopic measurements of urea, creatinine, glucose, protein, and ketone in urine                    | NIR      | PLS                                                                                           | Matlab          | -              | 120  | - Urea<br>- Creatinine,<br>- Glucose<br>- Protein<br>- Ketone                                      | n.s.   | n.s.                                                                        | 0.45 μm | no     | 4000 – 9000                         | no | -                        | 2 cm <sup>-1</sup> | -                                                                                                                                 | n.s.  | -                                                                          |
| 1<br>3<br>9 | W. Premasiri          | 2001 | Urine analysis by laser Raman spectroscopy                                                                                                          | RS/SERS  | Calibration curve                                                                             | n.s.            | Gold Colloidal | 5    | - Urea<br>- Uric acid<br>- Creatinine                                                              | 50 μL  |                                                                             | no      | no     | 400 – 1900                          | no | 785nm<br>120mW<br>20s    | n.s.               | n.s.                                                                                                                              | n.s.  | - No Storage<br>- Room temperature analyse<br>- Human and artificial urine |
| 1<br>4<br>0 | H.M. Heise            | 2001 | Multivariate Calibration for the Determination of Analytes in Urine Using Mid-Infrared Attenuated Total Reflection Spectroscopy                     | ATR-FTIR | PLS                                                                                           | Matlab          | -              | 67   | - Urea<br>- Creatinine<br>- Uric acid<br>- Glucose<br>- Total protein,<br>- Phosphate<br>- Sulfate | 50 μL  | -                                                                           | no      | -35 °C | 1800 – 800                          | no | -                        | 4 cm <sup>-1</sup> | 1% aqueous solution of Dextran enzymatic from Merck and ethanol                                                                   | 2min  | Analyse at 30°C                                                            |
| 1<br>4<br>1 | R.A. Shaw             | 2000 | Toward Reagent-free Clinical Analysis: Quantitation of Urine Urea, Creatinine, and Total Protein from the Mid-Infrared Spectra of Dried Urine Films | FTIR     | PLS                                                                                           | n.s.            | -              | 200  | - Urea<br>- Creatinine<br>- Total Protein                                                          | 12 μL  | n.s.                                                                        | no      | n.s.   | 900 – 1500 (potentially 800-5000)   | no | -                        | 4 cm <sup>-1</sup> | n.s.                                                                                                                              | n.s.  | Ambient temperature dried sample                                           |
| 1<br>4<br>2 | H.M. Heise            | 1999 | Quantitation of Metabolites and Salts in Urine by Attenuated Total Refection Infrared Spectroscopy, in Fourier Transform Spectroscopy               | ART-FTIR | PLS                                                                                           | Matlab          | -              | 67   | - Urea<br>- Creatinine<br>- Uric acid<br>- Phosphate<br>- Solphat<br>- Glucose                     | 50 μL  | n.s.                                                                        | no      | -35 °C | 400 – 4000                          | no | -                        | 4 cm <sup>-1</sup> | A cleaning cycle using a detergent (1% aqueous solution of Dextran enzymatic from Merck, Darmstadt), distilled water, and ethanol | n.s.  | Cell temperature was maintained at 30°C                                    |
| 1<br>4<br>3 | X. Dou                | 1997 | A highly sensitive, compact Raman system without a spectrometer for quantitative analysis of biological samples                                     | FT-RS    | Correlation coefficient                                                                       | n.s.            | -              | -    | - Glucose<br>- Acetone                                                                             | 500 μL | n.s.                                                                        | no      | no     | 300 – 1900                          | no | 980nm<br>100mW<br>1s     | n.s                | -                                                                                                                                 | n.s.  | - Spiked Urine<br>- Samples analysed within 1 Hour                         |
| 1<br>4<br>4 | R.A. Shaw             | 1996 | Quantitation of protein, creatinine, and urea in urine by near-infrared spectroscopy                                                                | NIR      | - Multiple wavelength linear regression<br>- PLS                                              | n.s.            | -              | 177  | - Protein<br>- Creatinine<br>- Urea                                                                | n.s.   | n.s.                                                                        | no      | n.s.   | 400 – 2400                          | no | -                        | n.s                | n.s.                                                                                                                              | n.s.  | -                                                                          |
| 1<br>4<br>5 | X. Dou                | 1996 | Quantitative Analysis of Metabolites in Urine by Anti-Stokes Raman Spectroscopy                                                                     | RS       | Correlation coefficient                                                                       | n.s.            | -              | 3    | - Glucose<br>- Acetone<br>- Urea                                                                   | n.s.   | Gluc. 120 mg/dL<br>Ace. 6.58 mg/ml<br>Ur. 35.6 mg/ml                        | no      | n.s.   | 200 – 2500                          | no | 514nm<br>100mW<br>1-5s   | 6 cm <sup>-1</sup> | n.s.                                                                                                                              | n.s.  | Spiked Urine                                                               |
| 1<br>4<br>6 | X. Dou                | 1996 | Quantitative analysis of metabolites in urine using a highly precise, compact near-infrared Raman spectrometer                                      | NIR-RS   | Correlation coefficient                                                                       | n.s.            |                | n.s. | - Glucose<br>- Acetone<br>- Urea<br>- Creatinine                                                   | n.s.   |                                                                             | no      | n.s.   | 0 – 2500                            | no | 820nm<br>130mW<br>1s     | 2 cm <sup>-1</sup> | n.s.                                                                                                                              | n.s.  | -                                                                          |
| 1<br>4<br>7 | A.W. van Toorenbergen | 1994 | Assay of glucose in urine by near-infrared spectrophotometry                                                                                        | NIR      | Multiple linear regression                                                                    | Quattro pro 4.0 | -              | 52   | Glucose                                                                                            | n.s.   | n.s.                                                                        | no      | n.s.   | 1440 – 2360                         | no | -                        | n.s.               | n.s.                                                                                                                              | <1min | -                                                                          |

|             |                     |      |                                                                                                                                                    |  |         |                          |      |   |      |                                                                                                   |        |                |                            |        |                             |      |      |                    |                                                                                                        |        |                                                                                        |
|-------------|---------------------|------|----------------------------------------------------------------------------------------------------------------------------------------------------|--|---------|--------------------------|------|---|------|---------------------------------------------------------------------------------------------------|--------|----------------|----------------------------|--------|-----------------------------|------|------|--------------------|--------------------------------------------------------------------------------------------------------|--------|----------------------------------------------------------------------------------------|
| 1<br>4<br>8 | K.S.<br>Kalasinskyt | 1993 | Detection of Amphetamine and Methamphetamine in Urine by Gas Chromatography/Fourier Transform Infrared (GC/FTIR) Spectroscopy                      |  | GC/FTIR | coefficient of variation | n.s. | - | n.s. | - Amphetamine<br>- Methamphetamine                                                                | 2 µL   | 10 ng/mL       | n.s.                       | n.s.   | 500 – 4000 cm <sup>-1</sup> | n.s. | -    | 8 cm <sup>-1</sup> | n.s.                                                                                                   | n.s.   | -Spiked Urine                                                                          |
| 1<br>4<br>9 | J.T. Grismer        | 1966 | Infrared Spectroscopy and Osmolality Analysis of Urine: Two Simple Sensitive Methods for Early Detection of Postoperative Anuria After Thoracotomy |  | IR      | n.s.                     | n.s. | - | 30   | - Osmolality<br>- Urea<br>- Sulfates<br>- mono- and di-basic Phosphates<br>- Glucose<br>- Dextran | 0.5 ml | Urea 200mg /mL | no                         | n.s.   | 1000 – 1550                 | no   | -    | n.s.               | n.s.                                                                                                   | 12min  | Urine sample collected prior to the surgical procedure, through catheter               |
| 1<br>5<br>0 | L.T. Rozelle        | 1965 | Identification of Major Infrared Absorbing Components of Human Urin                                                                                |  | IR      | n.s.                     | n.s. | - | n.s. | - Phosphate<br>- Solphate<br>- Urea<br>- Glucose                                                  | n.s.   | -              | no                         | < 0 °C | 1000-1500                   | no   | -    | n.s.               | The sample cells were cleaned with distilled water after use and flushed with appropriate Urine sample | n.s.   | The urine samples were allowed to come room temperature before analyse Analyze at 35°C |
| 1<br>5<br>1 | J. Clausen          | 1963 | Mucopolysaccharidosis: Paper Electrophoretic and Infra-Red Analysis of the Urine in Gargoylism and Morquio-Ullrich's Disease                       |  | IR      | n.s.                     | n.s. | - | n.s. | Mucopolysaccharides                                                                               | n.s.   | n.s.           | yes<br>Whatman n. 1 filter | n.s.   | 650 – 5000                  | n.s. | n.s. | n.s.               | n.s.                                                                                                   | n.s.   | -                                                                                      |
| 1<br>5<br>2 | K. Dobriner         | 1948 | The application of infrared spectrometry to fractionation of urinary metabolism ketosteroids                                                       |  | IR      | Calibration curve        | n.s. | - | -    | Ketosteroids                                                                                      | 0.2ml  | 0.5%solution   | no                         | n.s.   | 800 – 1200                  | n.s. | n.s. | n.s.               | Carbon disulfide                                                                                       | <10min | -                                                                                      |

Colours-Legend

|  |                                                                           |
|--|---------------------------------------------------------------------------|
|  | Method or Technique without in Test in-Vivo or in Clinical setting        |
|  | Method or Technique applied for Oncological purpose                       |
|  | Method or Technique applied in Clinical /In Vivo setting- non-Oncological |
|  | Animal Urine                                                              |
|  | Artificial Urine                                                          |

Abbreviations

|                   |                                                                       |                   |                                            |
|-------------------|-----------------------------------------------------------------------|-------------------|--------------------------------------------|
| <b>AuNPs</b>      | Gold nanoparticles                                                    | <b>GA</b>         | Genetic Algoritms                          |
| <b>AuNRs</b>      | Gold Nonorods                                                         | <b>Au/ZnO NRS</b> | Zink Oxid Gold Nanorods                    |
| <b>PCA</b>        | Principal Component Analysis                                          | <b>AgNPs</b>      | Silver nanoparticles                       |
| <b>SIMCA</b>      | soft independent modelling of class analogy                           | <b>PLS</b>        | Partial least squires                      |
| <b>SNV</b>        | Standard Normal Variate                                               | <b>LDA</b>        | Linear discriminant analysis               |
| <b>MCS-ALS</b>    | Multivariate curve resolution alternating least square                | <b>MLR</b>        | Multilinear regression                     |
| <b>AgNF</b>       | nanoporous silver film                                                | <b>CLS</b>        | classic least squares                      |
| <b>AgNCs</b>      | silver nanocubes                                                      | <b>SEP</b>        | Standard error of prediction               |
| <b>MCR-ALS</b>    | multivariate curve resolution-alternating least squares               | <b>DFA</b>        | discriminant function analysis             |
| <b>PLSR</b>       | Partial least squares regression                                      | <b>RMSEC</b>      | root mean square error of calibration      |
| <b>GNPs</b>       | colloidal gold nanoparticles                                          | <b>RMSECV</b>     | root mean square error of cross validation |
| <b>GA-PLS-LDA</b> | Genetic algorithms-partial least squares-linear discriminant analysis | <b>RMSEP</b>      | root mean square error of prediction       |
| <b>SiO2–AuNPs</b> | Silicon chips with a self-assembled monolayer of Gold nanoparticles   | <b>PCR</b>        | principal component regression             |
| <b>RSD</b>        | Relative Standard deviation                                           | <b>MPCA</b>       | Moving principal component analysis        |
